# Supplementary material for: Isolation and Genomics of Futiania mangrovii gen. nov., sp. nov., a Rare and Metabolically Versatile Member in the Class Alphaproteobacteria
Source: PubMed Central journal article supplement (PMC9927469; doi:10.1128/spectrum.04110-22), 2022-12-21
Supplement: spectrum.04110-22-s0001.pdf [file spectrum.04110-22-s0001.pdf]

## Isolation and Genomics of *Futania mangrovii* gen. nov., sp. nov., a Rare and Metabolically-versatile Member in the Class Alphaproteobacteria

Lirui Liu, Wen-Cong Huang, Jie Pan, Jiayi Li, Yuhan Huang, Huan Du, Yang Liu, Meng Li\*

\*Corresponding author:

Prof. Meng Li, [limeng848@szu.edu.cn](mailto:limeng848@szu.edu.cn)

This PDF file includes Figure S1-S6 and Table S1-S7.

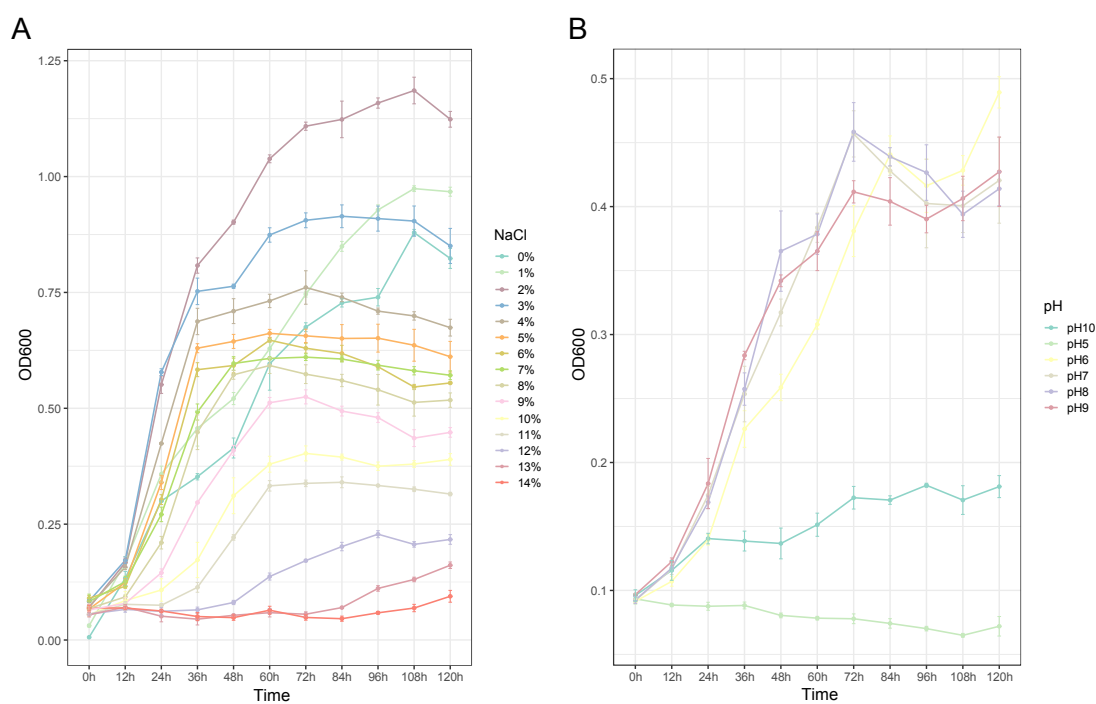

**Fig S1. Growth curves of strain FT118<sup>T</sup> in 2216 broth at 37°C under (A) different salinities and (B) pH. OD were measured in triplicates and error bars represented standard errors.**

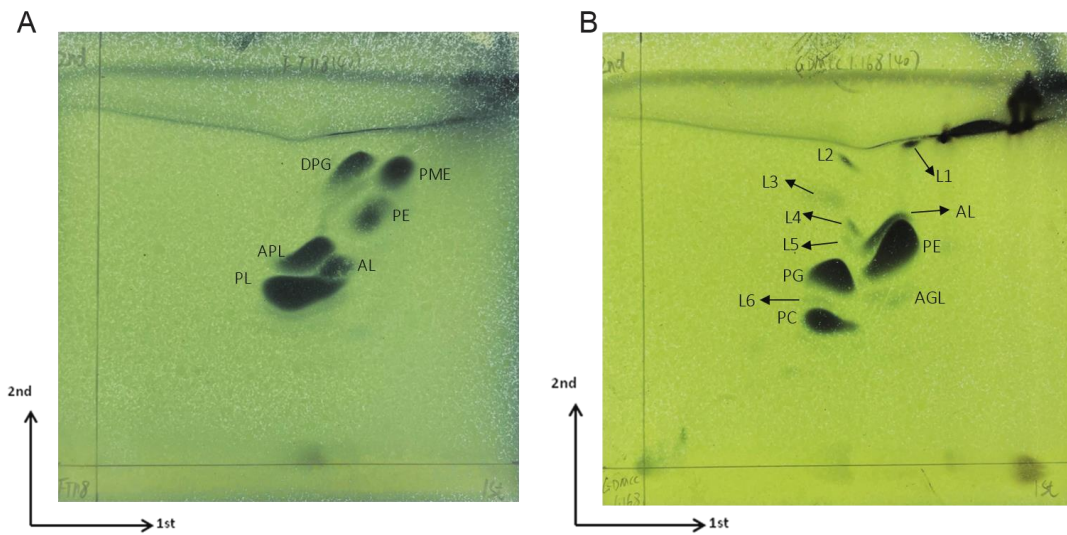

**Fig S2. Two-dimensional TLC plates showing polar lipid profiles of (A) strain FT118<sup>T</sup> and (B) *Rhodobacter capsulatus* GDMCC 1.168<sup>T</sup>.** DPG, diphosphatidylglycerol; PE, phosphatidylethanolamine; PME, phosphatidylmethylethanolamine; PG, phosphatidylglycerol; PC, phosphatidylcholine; AL, unidentified aminolipid; AGL, unknown aminoglycolipid; APL, unidentified aminophospholipid; PL, unidentified phospholipid; L1-6, unidentified lipids.

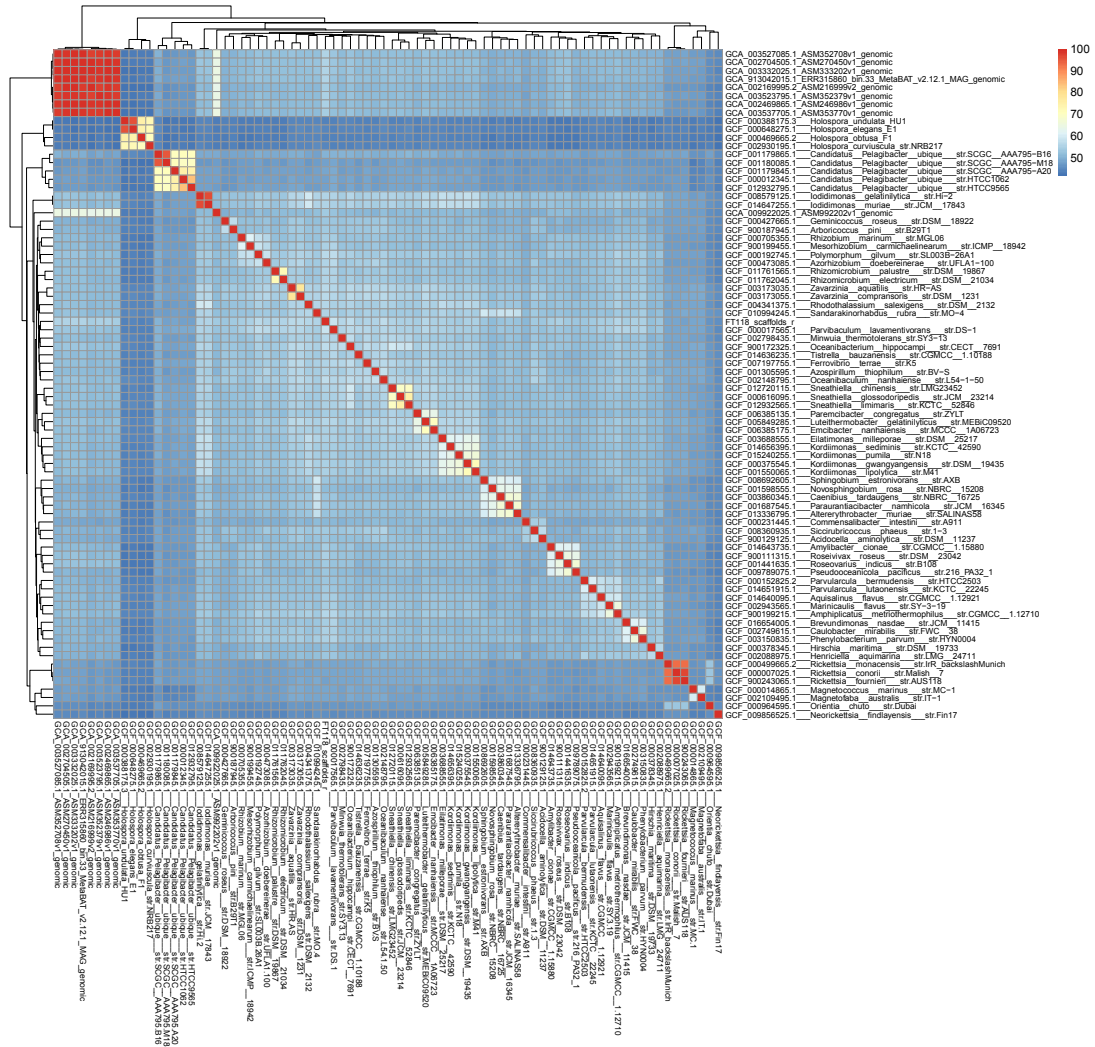

**Fig S3. Pairwise AAI comparison between *Futianiales* genomes and representative genomes in *Alphaproteobacteria*.** The result was obtained using CompareM v0.1.2 (<https://github.com/dparks1134/CompareM>). *Futianiales* genomes were marked in red.

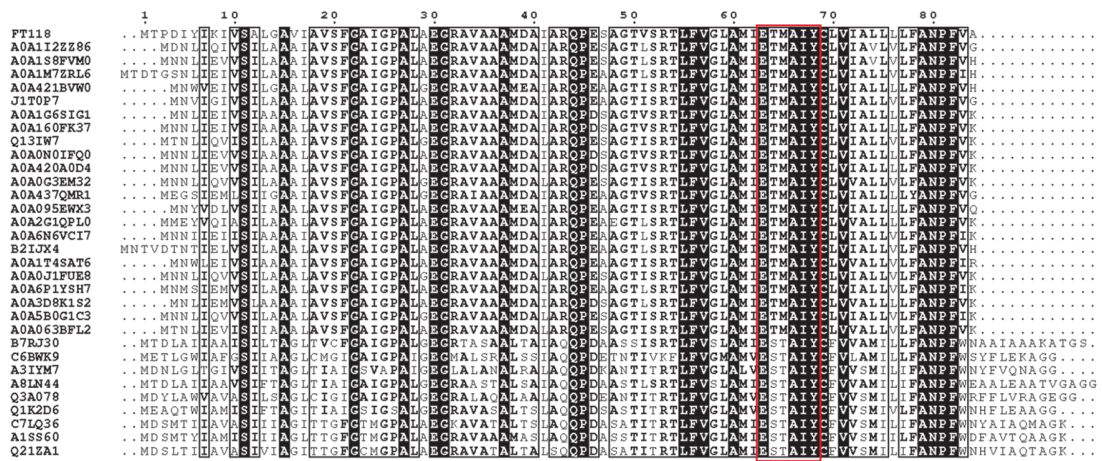

**Fig S4. Multiple sequence alignment of c subunits of N-type ATPases in strain FT118<sup>T</sup> and other *Pseudomonadota* representatives.** Sequences are listed under their Uniprot accession numbers. Amino acid residues that function as Na<sup>+</sup>/H<sup>+</sup>-binding sites are marked with asterisks. The “ESTxxY” motif for Na<sup>+</sup> binding is boxed in red.

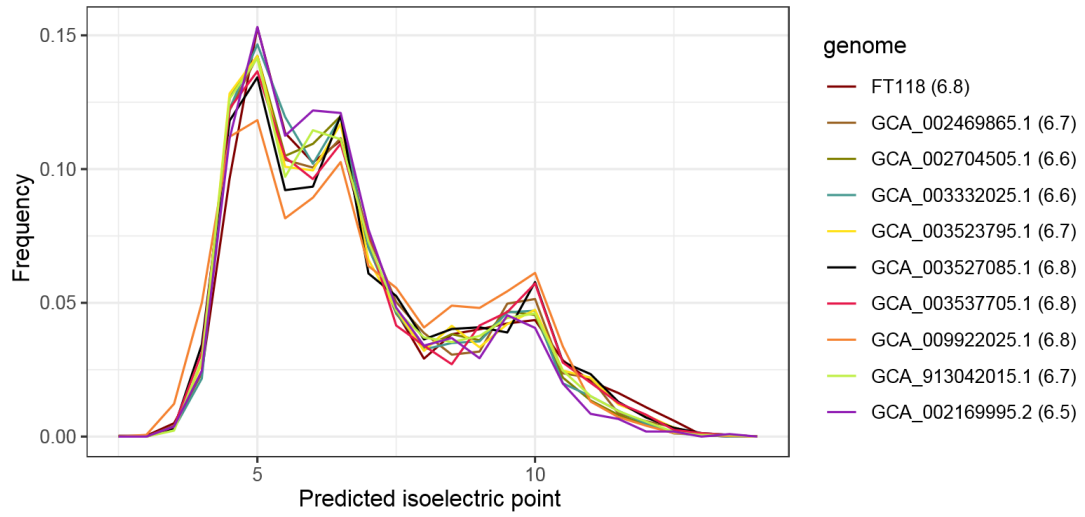

**Fig S5. Isoelectric point profiles of *Futariales* genomes.** Numbers in the parentheses indicate the average isoelectric point of each genome.

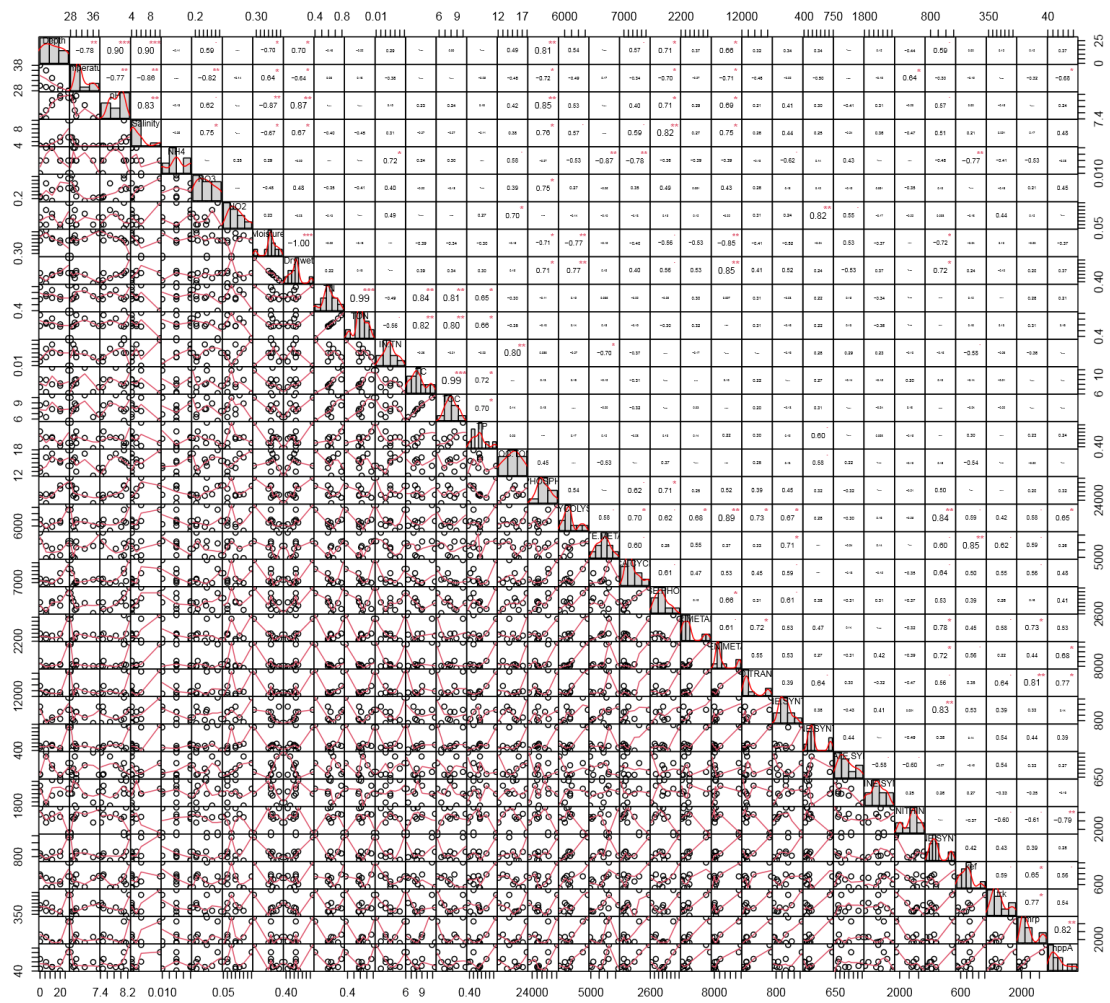

**Fig S6. Spearman correlation between the expression level of major metabolic pathway/adaptive features in FT118<sup>T</sup> and measured environmental variables of mangrove sediment samples.** Data (from left to right) include depth, temperature, pH, salinity, NH<sub>4</sub><sup>+</sup>-N, NO<sub>3</sub><sup>-</sup>-N, NO<sub>2</sub><sup>-</sup>-N, moisture, dry/wet ratio, total nitrogen, total organic nitrogen, inorganic nitrogen/total nitrogen, total carbon, total organic carbon, total phosphorus, total organic carbon/total organic nitrogen, the expression of oxidative phosphorylation, glycolysis, pyruvate metabolism, TCA cycle, pentose phosphate, sulfur metabolism, nitrogen metabolism, amino acid transporters (*aapJQMP*, *livFGHKM*, *ABC.PA.S*), alanine synthesis (*dat*, *alr*, *ald*), ectoine/hydroxyectoine synthesis (*ectABCD*), glutamate synthesis (*gltBD*), glutamine synthesis (*glnA*), N- $\delta$ -Acetyl-ornithine synthesis (*argBCDJ*), proline synthesis (*proABC*), *kefABC*, *trkAH*, Mrp complex and *hppA*. The expression level of a pathway is represented by the sum of TPM values of all genes involved in the pathway. The TPM values of genes were listed in Table S4. The measured environmental variables of sediment samples were given in Table S7. The Spearman correlation analysis was performed using R package PerformanceAnalytics (1). The symbol “\*\*\*”, “\*\*”, “\*”, “,” and “” corresponded with  $p < 0.001$ ,  $p < 0.01$ ,  $p < 0.05$ ,  $p < 0.1$  and  $p < 1$ , respectively.

**Table S1A. Complete results of API 20NE test of *Futiania mangrovii* FT118<sup>T</sup>.** +, positive; -, negative; w, weakly positive.

| API 20NE Reaction/Substrate                | FT118 |
|--------------------------------------------|-------|
| Reduction of nitrate to nitrite            | +     |
| Denitrification                            | -     |
| Indole production                          | -     |
| D-glucose fermentation                     | -     |
| Arginine DiHydrolase                       | -     |
| UREase                                     | -     |
| $\beta$ -glucosidase (Aesculin hydrolysis) | -     |
| Gelatin hydrolysis                         | +     |
| Beta-galactosidase                         | +     |
| D-glucose                                  | -     |
| L-arabinose                                | -     |
| D-mannose                                  | -     |
| D-mannitol                                 | -     |
| N-acetyl-glucosamine                       | -     |
| D-maltose                                  | -     |
| Potassium gluconate                        | -     |
| Capric acid                                | -     |
| Adipic acid                                | -     |
| Malic acid                                 | -     |
| Trisodium citrate                          | -     |
| Phenylacetic acid                          | -     |

**Table S1B. Complete results of API ZYM test of *Futiania mangrovii* FT118<sup>T</sup>.** +, positive; -, negative; w, weakly positive.

| API ZYM Reaction/Substrate         | FT118 |
|------------------------------------|-------|
| Water                              | -     |
| Alkaline phosphatase               | +     |
| Esterase(C4)                       | +     |
| Esterase lipase (C8)               | +     |
| Lipase (C14)                       | -     |
| Leucine arylamidase                | +     |
| Valine arylamidase                 | +     |
| Cystine arylamidase                | -     |
| Trypsin                            | -     |
| $\alpha$ -chymotrypsin             | -     |
| Acid phosphatase                   | w     |
| Naphtol-AS-BI-phosphohydrolase     | +     |
| $\alpha$ -galactosidase            | -     |
| $\beta$ -galactosidase             | -     |
| $\beta$ -glucuronidase             | -     |
| $\alpha$ -glucosidase              | -     |
| $\beta$ -glucosidase               | -     |
| N-acetyl- $\beta$ -glucosaminidase | -     |
| $\alpha$ -mannosidase              | -     |
| $\alpha$ -fucosidase               | -     |



**Table S1C. Complete results of Biolog GNIII test of *Futania mangrovii* FT118<sup>T</sup>.** +, positive; -, negative; w, weakly positive.

| Biolog GNIII substrate          | Well | FT118 | Biolog GNIII substrate       | Well | FT118 |
|---------------------------------|------|-------|------------------------------|------|-------|
| Negative Control                | A1   | -     | Gelatin                      | E1   | -     |
| Dextrin                         | A2   | w     | Glycyl-L-Proline             | E2   | -     |
| D-Maltose                       | A3   | -     | L-Alanine                    | E3   | -     |
| D-Trehalose                     | A4   | -     | L-Arginine                   | E4   | -     |
| D-Cellobiose                    | A5   | -     | L-Aspartic Acid              | E5   | -     |
| Gentiobiose                     | A6   | -     | L-Glutamic Acid              | E6   | -     |
| Sucrose                         | A7   | -     | L-Histidine                  | E7   | w     |
| D-Turanose                      | A8   | w     | L-Pyroglutamic Acid          | E8   | -     |
| Stachyose                       | A9   | -     | L-Serine                     | E9   | -     |
| Positive Control                | A10  | +     | Lincomycin                   | E10  | w     |
| pH 6                            | A11  | +     | Guanidine HCl                | E11  | w     |
| pH 5                            | A12  | -     | Niaproof 4                   | E12  | w     |
| D-Raffinose                     | B1   | -     | Pectin                       | F1   | -     |
| $\alpha$ -D-Lactose             | B2   | -     | D-Galacturonic Acid          | F2   | w     |
| D-Melibiose                     | B3   | -     | L-Galactonic Acid Lactone    | F3   | w     |
| $\beta$ -Methyl-D-Glucoside     | B4   | -     | D-Gluconic Acid              | F4   | -     |
| D-Salicin                       | B5   | -     | D-Glucuronic Acid            | F5   | w     |
| N-Acetyl-D-Glucosamine          | B6   | -     | Glucuronamide                | F6   | +     |
| N-Acetyl- $\beta$ -DMannosamine | B7   | -     | Mucic Acid                   | F7   | -     |
| N-Acetyl-D-Galactosamine        | B8   | -     | Quinic Acid                  | F8   | -     |
| N-AcetylNeuraminic Acid         | B9   | +     | D-Saccharic Acid             | F9   | w     |
| 1% NaCl                         | B10  | w     | Vancomycin                   | F10  | w     |
| 4% NaCl                         | B11  | w     | Tetrazolium Violet           | F11  | w     |
| 8% NaCl                         | B12  | w     | Tetrazolium Blue             | F12  | w     |
| $\alpha$ -D-Glucose             | C1   | -     | p-Hydroxy-Phenylacetic Acid  | G1   | -     |
| D-Mannose                       | C2   | -     | Methyl Pyruvate              | G2   | -     |
| D-Fructose                      | C3   | w     | D-Lactic Acid Methyl Ester   | G3   | -     |
| D-Galactose                     | C4   | -     | L-Lactic Acid                | G4   | -     |
| 3-Methyl Glucose                | C5   | -     | Citric Acid                  | G5   | -     |
| D-Fucose                        | C6   | w     | $\alpha$ -Keto-Glutaric Acid | G6   | w     |
| L-Fucose                        | C7   | w     | D-Malic Acid                 | G7   | -     |
| L-Rhamnose                      | C8   | w     | L-Malic Acid                 | G8   | w     |
| Inosine                         | C9   | -     | Bromo-Succinic Acid          | G9   | -     |
| 1% Sodium Lactate               | C10  | w     | Nalidixic Acid               | G10  | w     |
| Fusidic Acid                    | C11  | w     | Lithium Chloride             | G11  | -     |
| D-Serine                        | C12  | w     | Potassium Tellurite          | G12  | w     |
| D-Sorbitol                      | D1   | -     | Tween 40                     | H1   | -     |
| D-Mannitol                      | D2   | -     | $\gamma$ -Amino-Butyric Acid | H2   | -     |

|                  |     |   |                                     |     |   |
|------------------|-----|---|-------------------------------------|-----|---|
| D-Arabitol       | D3  | - | $\alpha$ -Hydroxy-Butyric Acid      | H3  | - |
| myo-Inositol     | D4  | + | $\beta$ -Hydroxy-<br>D,LButyricAcid | H4  | - |
| Glycerol         | D5  | - | $\alpha$ -Keto-Butyric Acid         | H5  | - |
| D-Glucose-6-PO4  | D6  | - | Acetoacetic Acid                    | H6  | w |
| D-Fructose-6-PO4 | D7  | + | Propionic Acid                      | H7  | - |
| D-Aspartic Acid  | D8  | - | Acetic Acid                         | H8  | - |
| D-Serine         | D9  | w | Formic Acid                         | H9  | - |
| Troleandomycin   | D10 | w | Aztreonam                           | H10 | w |
| Rifamycin SV     | D11 | w | Sodium Butyrate                     | H11 | w |
| Minocycline      | D12 | w | Sodium Bromate                      | H12 | w |

**Table S2. Cellular fatty acid profile of strain FT118<sup>T</sup> and representative species of related orders in *Alphaproteobacteria* (percent in total fatty acid).**

Major fatty acids (> 5%) were indicated in bold type. Components less than 0.1% were shown as trace. -, not detected. Data for *Rhodobacter capsulatus* GDMCC 1.168<sup>T</sup> is obtained from this study. Data for *Caulobacter vibrioides* DSM 4738<sup>T</sup> is obtained from (2-3). Data for *Parvularcula bermudensis* HTCC2503<sup>T</sup> is obtained from (4). Data for *Micropepsis pineolensis* JCM 30711<sup>T</sup> is obtained from (5).

|                             |                         | FT118 <sup>T</sup> | <i>Rhodobacter capsulatus</i><br>GDMCC 1.168 <sup>T</sup> | <i>Caulobacter vibrioides</i> DSM<br>4738 <sup>T</sup> | <i>Parvularcula bermudensis</i><br>HTCC2503 <sup>T</sup> | <i>Micropepsis</i><br><i>pineolensis</i> JCM<br>30711 <sup>T</sup> |
|-----------------------------|-------------------------|--------------------|-----------------------------------------------------------|--------------------------------------------------------|----------------------------------------------------------|--------------------------------------------------------------------|
| Saturated                   | C12:0                   | 0.43               | -                                                         | trace                                                  | <b>5.2</b>                                               | 0.4                                                                |
|                             | C13:0                   | 0.23               | -                                                         | -                                                      | -                                                        | -                                                                  |
|                             | C14:0                   | 0.59               | 0.12                                                      | 1.1                                                    | 2.9                                                      | <b>17</b>                                                          |
|                             | C15:0                   | -                  | -                                                         | 1                                                      | -                                                        | 0.2                                                                |
|                             | C16:0                   | <b>7.62</b>        | 1.81                                                      | <b>16.7</b>                                            | <b>8.6</b>                                               | <b>13.2</b>                                                        |
|                             | C17:0                   | 1.62               | 0.11                                                      | trace                                                  | -                                                        | -                                                                  |
|                             | C18:0                   | 2.8                | 0.96                                                      | 0.6                                                    | 4                                                        | 2.2                                                                |
|                             | C19:0 cyclo $\omega$ 8c | <b>16.1</b>        | -                                                         | -                                                      | <b>22</b>                                                | -                                                                  |
|                             | Unsaturated             | C17:1 $\omega$ 6c  | -                                                         | trace                                                  | -                                                        | -                                                                  |
| C17:1 $\omega$ 8c           |                         | -                  | trace                                                     | -                                                      | -                                                        | -                                                                  |
| C18:1 $\omega$ 5c           |                         | 0.39               | 0.13                                                      | -                                                      | -                                                        | -                                                                  |
| C18:1 $\omega$ 7c           |                         | <b>54.06</b>       | <b>75.98</b>                                              | <b>35.5</b>                                            | <b>73.3</b>                                              | <b>36.7</b>                                                        |
| C18:1 $\omega$ 7c 11-methyl |                         | 4.72               | -                                                         | 6.2                                                    | -                                                        | 0.9                                                                |
| C18:1 $\omega$ 9c           |                         | -                  | -                                                         | trace                                                  | 6                                                        | -                                                                  |
| C20:1 $\omega$ 7c           |                         | 0.56               | -                                                         | -                                                      | -                                                        | -                                                                  |
| C20:2 $\omega$ 6,9c         |                         | 0.32               | -                                                         | -                                                      | -                                                        | 0.6                                                                |
| Branched chain              |                         | iso-C13:0 3OH      | -                                                         | -                                                      | trace                                                    | -                                                                  |
|                             | iso-C15:0               | -                  | -                                                         | <b>8.9</b>                                             | -                                                        | -                                                                  |
|                             | C15:0 anteiso           | -                  | 0.14                                                      | trace                                                  | -                                                        | -                                                                  |
|                             | iso-C16:0               | -                  | -                                                         | 0.5                                                    | -                                                        | -                                                                  |
|                             | iso-C17:1 $\omega$ 9c   | -                  | -                                                         | 2.3                                                    | -                                                        | -                                                                  |
|                             | iso-C17:0               | -                  | -                                                         | <b>11.2</b>                                            | -                                                        | -                                                                  |
|                             | C17:0 anteiso           | -                  | 0.09                                                      | 1.9                                                    | -                                                        | -                                                                  |
|                             | C18:0 iso               | -                  | <b>7.59</b>                                               | -                                                      | -                                                        | -                                                                  |
|                             | Hydroxy substituted     | C10:0 3OH          | -                                                         | 2.16                                                   | -                                                        | -                                                                  |
| C12:0 3OH                   |                         | -                  | -                                                         | trace                                                  | -                                                        | -                                                                  |
| C12:1 3OH                   |                         | -                  | -                                                         | 1.2                                                    | -                                                        | -                                                                  |
| C14:0 2OH                   |                         | -                  | -                                                         | -                                                      | -                                                        | -                                                                  |
| C15:0 3OH                   |                         | -                  | -                                                         | -                                                      | -                                                        | 0.1                                                                |
| C16:0 3OH                   |                         | 0.53               | 0.11                                                      | -                                                      | -                                                        | 4.6                                                                |
| C17:0 3OH                   |                         | 0.51               | -                                                         | -                                                      | -                                                        | -                                                                  |

|                   |      |             |          |   |     |
|-------------------|------|-------------|----------|---|-----|
| C18:0 3OH         | 3.45 | 1.61        | -        | - | -   |
| C18:1 2OH         | 4.09 | -           | -        | - | -   |
| Summed feature 2* | 0.94 | -           | -        | - | -   |
| Summed feature 3* | 0.46 | <b>8.43</b> | <b>9</b> | - | 0.8 |
| Summed feature 7* | 0.58 | 0.76        | -        | - | 0.2 |

\*Summed Features are fatty acids that cannot be resolved reliably from another fatty acid using the chromatographic conditions chosen. The MIDI system groups these fatty acids together as one feature with a single percentage of the total. Summed feature 2 contained C14:0 3-OH and/or iso I-C16:1, Summed Feature 3 contained C16:1  $\omega$ 7c and/or C16:1  $\omega$ 6c, Summed Feature 7 contained C19:1  $\omega$ 6c, C19:1  $\omega$ 7c and/or C19:0 cyclo  $\omega$ 10c.

**Table S3. Genomic features of *Futaniales* genomes.**

| Genome                                   | Genbank accession | Size (bp) | GC content (mol%) | #Contig | Largest contig (bp) | N50 (bp) | Completeness (%) | Contamination (%) | Reference  |
|------------------------------------------|-------------------|-----------|-------------------|---------|---------------------|----------|------------------|-------------------|------------|
| FT118                                    | JAMZFT000000000   | 3397356   | 68.5              | 6       | 1448022             | 1219768  | 99.57            | 0.22              | This study |
| Rhodobacteraceae bacterium               | GCA_002704505.1   | 2165014   | 50.8              | 32      | 375574              | 119749   | 94.66            | 8.8               | -          |
| Alphaproteobacteria bacterium            | GCA_009922025.1   | 4117200   | 45.6              | 971     | 78196               | 10111    | 94.08            | 9.93              | (6)        |
| Alphaproteobacteria bacterium UBA7371    | GCA_002469865.1   | 1629558   | 49.9              | 175     | 37017               | 11712    | 83.8             | 0.88              | (7)        |
| SAR116 cluster bacterium                 | GCA_003332025.1   | 1613672   | 51.2              | 42      | 111444              | 57987    | 82.88            | 0                 | -          |
| uncultured Alphaproteobacteria bacterium | GCA_913042015.1   | 1585126   | 51.1              | 230     | 30590               | 8473     | 82.82            | 1.2               | -          |
| Alphaproteobacteria bacterium            | GCA_003537705.1   | 1385405   | 50                | 261     | 22506               | 5615     | 66.68            | 0.93              | -          |
| Alphaproteobacteria bacterium            | GCA_003523795.1   | 1280707   | 50                | 252     | 15724               | 5408     | 63.16            | 1.2               | -          |
| Alphaproteobacteria bacterium            | GCA_003527085.1   | 1343714   | 49.6              | 263     | 14912               | 5452     | 61.1             | 0                 | -          |
| Alphaproteobacteria bacterium TMED150    | GCA_002169995.2   | 1038806   | 50.6              | 5       | 375574              | 223112   | 60.34            | 0                 | (6)        |

**Table S4. Relative expression level (TPM) of genes involved in essential metabolic pathways in strain FT118<sup>T</sup>.**

| Gene name                 | EC               | KO                  | MF1 0-2cm | MF1 6-8cm | MF1 14cm | 12-<br>MF1 22cm | 20-<br>MF1 30cm | 28-<br>MG1 0-2cm | MG1 6-8cm | MG1 14cm | 12-<br>MG1 22cm | 20-<br>MG1 30cm | 28- |
|---------------------------|------------------|---------------------|-----------|-----------|----------|-----------------|-----------------|------------------|-----------|----------|-----------------|-----------------|-----|
| OXIDATIVE PHOSPHORYLATION |                  |                     |           |           |          |                 |                 |                  |           |          |                 |                 |     |
| nuoA                      | 1.6.5.3          | ko:K00330           | 1663.93   | 1289.45   | 1668.24  | 1884.24         | 2329.13         | 1351.23          | 1562.06   | 1636.75  | 1879.96         | 1820.29         |     |
| nuoB                      | 1.6.5.3          | ko:K00331           | 211.44    | 202.45    | 180.42   | 211.00          | 319.27          | 200.56           | 228.67    | 177.40   | 231.53          | 342.92          |     |
| nuoC                      | 1.6.5.3          | ko:K00332           | 743.98    | 629.71    | 744.10   | 851.95          | 1054.17         | 572.10           | 766.52    | 748.69   | 948.85          | 842.57          |     |
| nuoD                      | 1.6.5.3          | ko:K00333           | 151.91    | 159.19    | 173.55   | 161.93          | 188.41          | 193.58           | 223.28    | 164.12   | 91.52           | 221.93          |     |
| nuoE                      | 1.6.5.3,1.6.99.3 | ko:K00334,ko:K03943 | 637.78    | 550.03    | 665.56   | 692.74          | 1005.86         | 635.46           | 558.45    | 705.86   | 780.53          | 937.74          |     |
| nuoF                      | 1.6.5.3          | ko:K00335           | 651.78    | 608.05    | 697.49   | 747.11          | 966.94          | 622.34           | 714.55    | 822.94   | 839.55          | 819.12          |     |
| nuoG                      | 1.6.5.3          | ko:K00336           | 256.05    | 229.63    | 263.13   | 322.72          | 527.08          | 318.48           | 305.67    | 299.21   | 300.91          | 475.22          |     |
| nuoH                      | 1.6.5.3          | ko:K00337           | 1191.96   | 1139.10   | 1454.97  | 1621.51         | 2037.08         | 1042.77          | 1397.48   | 1748.39  | 1566.17         | 1580.84         |     |
| nuoI                      | 1.6.5.3,1.6.99.3 | ko:K00338,ko:K03941 | 241.38    | 254.61    | 225.33   | 238.78          | 463.26          | 220.28           | 221.25    | 213.78   | 313.13          | 551.12          |     |
| nuoJ                      | 1.6.5.3          | ko:K00339           | 261.81    | 310.33    | 442.73   | 501.39          | 706.74          | 314.22           | 420.27    | 413.55   | 624.61          | 559.85          |     |
| nuoK                      | 1.6.5.3          | ko:K00340           | 357.66    | 383.28    | 458.40   | 526.67          | 1016.27         | 455.65           | 491.76    | 533.62   | 601.58          | 823.26          |     |
| nuoL                      | 1.6.5.3          | ko:K00341           | 335.97    | 410.15    | 478.31   | 516.92          | 1032.94         | 420.48           | 565.68    | 560.13   | 614.18          | 832.01          |     |
| nuoM                      | 1.6.5.3          | ko:K00342           | 181.51    | 187.33    | 192.71   | 200.98          | 362.69          | 215.30           | 236.89    | 169.03   | 222.41          | 325.87          |     |
| nuoN                      | 1.6.5.3          | ko:K00343           | 181.27    | 363.23    | 286.99   | 160.11          | 183.82          | 296.34           | 438.77    | 427.34   | 195.55          | 207.24          |     |
| sdhC                      | -                | ko:K00241           | 151.79    | 139.55    | 113.03   | 148.00          | 198.30          | 161.90           | 189.71    | 76.59    | 169.32          | 344.25          |     |
| sdhD                      | -                | ko:K00242           | 753.85    | 556.87    | 609.13   | 688.18          | 1374.58         | 622.19           | 511.65    | 549.56   | 693.90          | 1154.09         |     |
| sdhA                      | 1.3.5.1,1.3.5.4  | ko:K00239           | 623.12    | 449.35    | 600.63   | 586.69          | 965.77          | 638.74           | 539.02    | 527.17   | 757.84          | 896.95          |     |
| sdhB                      | 1.3.5.1,1.3.5.4  | ko:K00240           | 32.68     | 28.66     | 17.87    | 44.00           | 81.77           | 17.04            | 64.38     | 0.00     | 0.00            | 81.82           |     |
| petC                      | -                | ko:K00413           | 166.88    | 166.41    | 184.47   | 139.10          | 209.74          | 131.72           | 175.32    | 111.04   | 148.21          | 227.00          |     |
| petB                      | -                | ko:K00410,ko:K00412 | 366.58    | 277.16    | 314.01   | 419.12          | 280.49          | 257.00           | 309.39    | 321.32   | 389.02          | 320.33          |     |
| petA                      | 1.10.2.2         | ko:K00411           | 284.73    | 201.63    | 221.69   | 233.83          | 329.36          | 247.54           | 262.56    | 190.38   | 218.53          | 332.13          |     |
| coxC                      | 1.9.3.1          | ko:K02276           | 386.94    | 365.41    | 451.82   | 454.33          | 240.04          | 755.45           | 777.40    | 468.85   | 488.75          | 207.81          |     |
| coxA                      | 1.9.3.1          | ko:K02274           | 1156.10   | 1024.78   | 1281.95  | 1525.31         | 985.68          | 1139.29          | 1358.38   | 1474.67  | 1755.33         | 886.60          |     |

|        |                        |                     |         |         |         |         |         |         |         |         |         |         |
|--------|------------------------|---------------------|---------|---------|---------|---------|---------|---------|---------|---------|---------|---------|
| coxB   | 1.9.3.1                | ko:K02275           | 107.22  | 104.91  | 122.94  | 143.58  | 144.17  | 125.68  | 88.59   | 86.56   | 119.20  | 210.83  |
| ccoN   | 1.9.3.1                | ko:K00404           | 708.62  | 530.96  | 738.47  | 773.33  | 743.89  | 794.67  | 777.96  | 662.44  | 917.17  | 626.97  |
| ccoO   | -                      | ko:K00405           | 67.00   | 68.37   | 113.21  | 86.11   | 104.49  | 50.80   | 105.58  | 73.76   | 33.18   | 52.75   |
| ccoQ   | -                      | ko:K00407           | 110.89  | 126.43  | 161.66  | 128.31  | 194.32  | 148.53  | 172.93  | 121.24  | 168.35  | 150.70  |
| ccoP   | -                      | ko:K00406           | 243.17  | 219.33  | 189.97  | 192.73  | 288.85  | 265.77  | 190.31  | 223.83  | 221.41  | 239.05  |
| atpG   | -                      | ko:K02115           | 284.43  | 242.72  | 297.01  | 300.14  | 252.52  | 221.83  | 174.69  | 216.36  | 201.59  | 286.18  |
| atpA_1 | 3.4.21.68<br>,3.6.3.14 | ko:K01343,ko:K02111 | 229.55  | 244.39  | 234.21  | 232.71  | 425.49  | 270.87  | 208.22  | 187.21  | 262.22  | 371.70  |
| atpF   | -                      | ko:K02109           | 300.42  | 240.62  | 309.59  | 189.72  | 382.62  | 284.58  | 253.48  | 214.64  | 344.02  | 437.51  |
| atpE   | -                      | -                   | 185.23  | 226.73  | 180.98  | 159.19  | 338.05  | 254.75  | 167.69  | 119.32  | 214.72  | 384.00  |
| atpB_1 | -                      | ko:K02108           | 185.70  | 352.54  | 189.51  | 139.23  | 243.62  | 384.69  | 319.04  | 326.31  | 192.43  | 264.91  |
| atpR   | -                      | -                   | 120.16  | 71.53   | 111.47  | 107.86  | 208.22  | 151.85  | 97.55   | 88.19   | 104.15  | 165.57  |
| atpQ   | -                      | ko:K02116           | 310.04  | 310.04  | 148.07  | 225.52  | 529.86  | 213.02  | 275.18  | 93.51   | 165.04  | 451.41  |
| atpC_2 | -                      | ko:K02114           | 256.82  | 401.12  | 268.60  | 425.48  | 411.86  | 310.45  | 343.13  | 234.39  | 246.39  | 338.49  |
| atpD_1 | 3.6.3.14               | ko:K02112           | 285.11  | 244.20  | 307.23  | 288.96  | 473.34  | 310.77  | 283.46  | 280.45  | 341.04  | 418.90  |
| atpG_1 | -                      | ko:K02115           | 261.77  | 297.76  | 334.04  | 274.81  | 563.52  | 327.87  | 291.52  | 252.40  | 354.34  | 516.30  |
| atpA_2 | 3.6.3.14               | ko:K02111           | 310.96  | 346.17  | 278.96  | 268.35  | 381.15  | 351.06  | 285.43  | 210.96  | 252.01  | 489.18  |
| -      | -                      | ko:K02109           | 140.48  | 181.96  | 232.37  | 143.07  | 482.34  | 177.76  | 175.97  | 134.50  | 171.72  | 372.42  |
| -      | -                      | ko:K02110           | 114.35  | 115.15  | 116.21  | 154.87  | 321.20  | 148.68  | 170.67  | 90.96   | 113.61  | 310.96  |
| atpB_1 | -                      | ko:K02108           | 131.15  | 108.65  | 89.84   | 93.61   | 341.86  | 123.01  | 89.64   | 70.16   | 68.87   | 379.78  |
| glcD   | 1.1.3.15               | ko:K00104           | 232.53  | 261.51  | 247.99  | 258.64  | 703.43  | 240.33  | 229.43  | 233.31  | 264.40  | 495.84  |
| -      | -                      | ko:K02116           | 120.90  | 144.91  | 179.00  | 118.69  | 244.86  | 115.54  | 190.52  | 96.59   | 92.63   | 316.31  |
| atpC_1 | -                      | ko:K02114           | 228.49  | 264.22  | 333.89  | 248.31  | 419.76  | 320.09  | 323.96  | 292.51  | 305.46  | 408.86  |
| -      | 3.6.3.14               | ko:K02112           | 145.12  | 151.03  | 133.55  | 117.24  | 225.91  | 173.16  | 195.34  | 122.04  | 146.60  | 185.92  |
| atpH   | -                      | ko:K02113           | 4264.45 | 2616.19 | 3617.83 | 4398.47 | 3172.70 | 3292.61 | 3428.76 | 3444.94 | 4527.42 | 2515.58 |
| atpA   | 3.6.3.14               | ko:K02111           | 280.29  | 219.84  | 284.05  | 362.06  | 317.10  | 195.62  | 264.85  | 257.57  | 266.94  | 242.40  |
| atpG   | -                      | ko:K02115           | 4542.71 | 3282.98 | 4203.64 | 5268.56 | 3724.08 | 3651.40 | 3887.57 | 4312.98 | 5541.59 | 3016.28 |
| atpD   | 3.6.3.14               | ko:K02112           | 95.71   | 120.17  | 119.80  | 140.74  | 164.44  | 138.30  | 146.86  | 88.96   | 128.65  | 204.51  |

|                     |                   |                     |         |         |         |         |         |         |         |         |         |         |
|---------------------|-------------------|---------------------|---------|---------|---------|---------|---------|---------|---------|---------|---------|---------|
| atpC                | -                 | ko:K02113,ko:K02114 | 137.43  | 141.19  | 129.47  | 107.39  | 176.01  | 133.05  | 116.02  | 116.40  | 135.38  | 118.23  |
| atpI                | -                 | ko:K02116           | 101.07  | 105.36  | 72.62   | 60.27   | 163.77  | 68.25   | 91.02   | 58.29   | 90.47   | 131.31  |
| atpB                | -                 | ko:K02108           | 126.14  | 122.92  | 124.13  | 133.05  | 140.93  | 147.11  | 113.75  | 91.94   | 131.73  | 121.40  |
| atpE                | -                 | ko:K02110           | 519.65  | 551.41  | 523.58  | 505.97  | 665.15  | 623.89  | 609.12  | 455.09  | 438.73  | 1036.87 |
| atpF2               | -                 | ko:K02109           | 226.02  | 247.66  | 237.29  | 181.87  | 258.34  | 197.79  | 204.35  | 308.98  | 181.53  | 314.90  |
| atpF2               | -                 | ko:K02109           | 92.59   | 105.11  | 125.12  | 126.07  | 152.70  | 104.13  | 127.88  | 111.29  | 124.70  | 138.54  |
| GLYCOLYSIS          |                   |                     |         |         |         |         |         |         |         |         |         |         |
| algC                | 5.4.2.2,5.4.2.8   | ko:K15778           | 73.81   | 89.91   | 82.48   | 95.01   | 122.14  | 100.35  | 103.53  | 60.57   | 76.23   | 126.45  |
| pgi                 | 5.3.1.9           | ko:K01810           | 142.19  | 201.15  | 208.28  | 152.75  | 259.73  | 207.80  | 167.31  | 146.98  | 181.15  | 282.17  |
| pfkB                | 2.7.1.11          | ko:K16370           | 92.50   | 159.61  | 164.00  | 124.54  | 328.80  | 227.63  | 98.49   | 171.55  | 170.25  | 292.30  |
| glpX                | 3.1.3.11,3.1.3.37 | ko:K02446,ko:K11532 | 306.39  | 256.81  | 298.82  | 287.67  | 404.54  | 292.47  | 251.07  | 256.43  | 331.08  | 408.67  |
| fbaB                | 4.1.2.13          | ko:K01623           | 199.51  | 235.03  | 215.45  | 180.41  | 342.75  | 280.09  | 199.52  | 259.51  | 228.81  | 265.60  |
| gapA                | 1.2.1.12          | ko:K00134           | 927.18  | 797.42  | 957.65  | 943.68  | 844.27  | 910.56  | 893.97  | 874.34  | 1017.79 | 779.85  |
| pgk                 | 2.7.2.3           | ko:K00927           | 211.26  | 212.00  | 222.25  | 231.75  | 341.74  | 246.88  | 194.98  | 199.61  | 202.92  | 325.77  |
| gpmI                | 5.4.2.12          | ko:K15633           | 95.56   | 168.74  | 99.79   | 75.17   | 143.26  | 116.42  | 101.52  | 104.02  | 61.42   | 116.24  |
| eno                 | 4.2.1.11          | ko:K01689           | 1059.59 | 879.27  | 1000.10 | 1144.38 | 651.57  | 748.88  | 623.37  | 857.15  | 739.43  | 633.39  |
| pyk                 | 2.7.1.40          | ko:K00873           | 270.43  | 268.32  | 292.25  | 208.13  | 453.30  | 250.79  | 198.51  | 220.45  | 224.81  | 494.89  |
| ppdK                | 2.7.9.1           | ko:K01006           | 1125.12 | 1171.19 | 1245.41 | 1218.86 | 1381.07 | 1300.71 | 1271.22 | 1378.41 | 1429.95 | 1155.71 |
| pdhA                | 1.2.4.1           | ko:K00161           | 118.77  | 76.92   | 66.59   | 147.61  | 211.88  | 105.84  | 76.79   | 61.47   | 41.48   | 235.74  |
| pdhC                | 1.2.4.1,2.3.1.12  | ko:K00162,ko:K00627 | 407.33  | 412.19  | 433.12  | 412.56  | 504.77  | 382.20  | 338.63  | 361.43  | 510.48  | 453.14  |
| pdhB                | 1.2.4.1           | ko:K00162           | 423.54  | 301.22  | 337.85  | 415.39  | 296.80  | 306.44  | 257.88  | 288.52  | 399.24  | 301.18  |
| -                   | 1.2.4.1           | ko:K00162,ko:K21417 | 232.23  | 250.17  | 242.68  | 194.39  | 553.83  | 402.82  | 323.06  | 191.85  | 251.93  | 654.14  |
| MA20_17010          | 1.2.4.1           | ko:K00163           | 163.40  | 228.13  | 202.39  | 166.52  | 320.83  | 246.50  | 236.85  | 167.79  | 162.32  | 282.87  |
| -                   | 2.3.1.12          | ko:K00627           | 154.41  | 178.11  | 196.73  | 135.66  | 270.63  | 216.47  | 154.66  | 158.47  | 206.75  | 273.42  |
| pckA                | 4.1.1.49          | ko:K01610           | 143.04  | 128.52  | 129.67  | 143.47  | 252.50  | 170.44  | 133.99  | 176.03  | 163.03  | 238.62  |
| PYRUVATE METABOLISM |                   |                     |         |         |         |         |         |         |         |         |         |         |



|                   |                 |           |         |         |         |         |         |         |         |         |         |         |
|-------------------|-----------------|-----------|---------|---------|---------|---------|---------|---------|---------|---------|---------|---------|
| phbC              | 2.3.1.304       | ko:K03821 | 821.01  | 677.69  | 694.34  | 877.17  | 480.87  | 632.81  | 578.10  | 742.50  | 725.00  | 502.84  |
| phbB              | 1.1.1.36        | ko:K00023 | 2256.00 | 1718.35 | 1843.04 | 1894.46 | 1328.00 | 1370.90 | 1071.29 | 1310.00 | 1301.90 | 1141.67 |
| phbA              | 2.3.1.9         | ko:K00626 | 161.74  | 163.60  | 135.56  | 96.18   | 245.32  | 205.45  | 137.15  | 102.74  | 98.41   | 281.78  |
| phaZ              | 3.1.1.75        | ko:K05973 | 100.66  | 93.78   | 101.04  | 118.87  | 129.75  | 128.46  | 80.62   | 49.96   | 64.06   | 157.22  |
| maeA              | 1.1.1.38        | ko:K00027 | 220.44  | 269.15  | 228.62  | 227.70  | 373.86  | 205.80  | 182.21  | 186.48  | 229.61  | 422.34  |
| maeB              | 1.1.1.40        | ko:K00029 | 713.76  | 637.22  | 796.94  | 684.55  | 1122.42 | 638.30  | 559.59  | 674.10  | 687.71  | 984.86  |
| acs               | 6.2.1.1         | ko:K01895 | 2128.23 | 1960.35 | 1548.44 | 1494.97 | 2031.82 | 2614.56 | 2116.31 | 1784.82 | 1797.10 | 2148.05 |
| aldH              | 1.2.1.3         | ko:K00128 | 257.56  | 246.07  | 232.62  | 278.51  | 375.21  | 269.23  | 227.06  | 200.19  | 240.45  | 300.80  |
| TCA CYCLE         |                 |           |         |         |         |         |         |         |         |         |         |         |
| mdh               | 1.1.1.37        | ko:K00024 | 1589.88 | 1345.69 | 1523.31 | 1465.86 | 1765.42 | 1303.30 | 1262.22 | 1330.58 | 1327.88 | 1573.43 |
| fumC              | 4.2.1.2         | ko:K01679 | 289.96  | 318.93  | 332.40  | 301.17  | 605.25  | 297.93  | 238.41  | 266.09  | 265.92  | 511.25  |
| sdhA              | 1.3.5.1,1.3.5.4 | ko:K00239 | 623.12  | 449.35  | 600.63  | 586.69  | 965.77  | 638.74  | 539.02  | 527.17  | 757.84  | 896.95  |
| sdhB              | 1.3.5.1,1.3.5.4 | ko:K00240 | 32.68   | 28.66   | 17.87   | 44.00   | 81.77   | 17.04   | 64.38   | 0.00    | 0.00    | 81.82   |
| sucD              | 6.2.1.5         | ko:K01902 | 497.84  | 445.52  | 502.17  | 538.98  | 688.06  | 447.33  | 435.23  | 446.37  | 523.76  | 609.71  |
| sucC              | 6.2.1.5         | ko:K01903 | 2488.27 | 2781.71 | 2198.26 | 2407.32 | 2920.48 | 2229.51 | 2381.88 | 2186.99 | 3254.09 | 2374.13 |
| sucA              | 1.2.4.2         | ko:K00164 | 496.78  | 415.29  | 417.83  | 493.18  | 585.85  | 441.38  | 437.57  | 405.35  | 604.12  | 667.68  |
| sucB              | 2.3.1.61        | ko:K00658 | 364.56  | 442.05  | 399.78  | 343.55  | 492.84  | 434.47  | 485.78  | 335.91  | 404.82  | 500.02  |
| idh1              | 1.1.1.42        | ko:K00031 | 454.38  | 374.65  | 379.42  | 461.64  | 486.81  | 375.77  | 359.34  | 420.07  | 413.92  | 368.95  |
| acnA              | 4.2.1.3         | ko:K01681 | 248.30  | 326.77  | 305.23  | 179.03  | 403.99  | 291.05  | 327.62  | 275.79  | 234.14  | 360.28  |
| gltA              | 2.3.3.1         | ko:K01647 | 408.28  | 458.05  | 468.33  | 379.82  | 829.31  | 511.97  | 423.78  | 435.84  | 404.44  | 777.45  |
| PENTOSE PHOSPHATE |                 |           |         |         |         |         |         |         |         |         |         |         |
| cbbT              | 2.2.1.1         | ko:K00615 | 482.96  | 481.08  | 527.52  | 504.60  | 891.41  | 516.40  | 559.45  | 582.53  | 657.84  | 748.11  |
| rpe               | 5.1.3.1         | ko:K01783 | 581.42  | 379.98  | 496.16  | 507.66  | 606.90  | 481.06  | 411.62  | 588.26  | 540.70  | 645.46  |
| rpiA              | 5.3.1.6         | ko:K01807 | 662.05  | 489.36  | 573.47  | 570.51  | 915.21  | 646.88  | 513.27  | 460.24  | 675.51  | 906.30  |
| prs               | 2.7.6.1         | ko:K00948 | 1285.53 | 1052.72 | 1329.06 | 1232.01 | 1224.74 | 974.03  | 1108.42 | 1417.48 | 1365.16 | 1076.35 |
| pmm-pgm           | 5.4.2.2,5.4.2.8 | ko:K15778 | 73.81   | 89.91   | 82.48   | 95.01   | 122.14  | 100.35  | 103.53  | 60.57   | 76.23   | 126.45  |

|                            |                       |                     |        |        |        |        |         |        |        |        |        |         |
|----------------------------|-----------------------|---------------------|--------|--------|--------|--------|---------|--------|--------|--------|--------|---------|
| phnN                       | 2.7.4.23              | ko:K05774           | 139.58 | 149.34 | 177.41 | 139.77 | 260.24  | 147.95 | 118.23 | 165.51 | 133.08 | 217.22  |
| <b>SULFUR METABOLISM</b>   |                       |                     |        |        |        |        |         |        |        |        |        |         |
| sulP                       | -                     | ko:K03321           | 573.31 | 550.93 | 563.45 | 744.74 | 511.32  | 569.26 | 543.19 | 588.59 | 673.17 | 545.71  |
| cysD                       | 2.7.7.4               | ko:K00957           | 161.80 | 163.19 | 194.88 | 154.03 | 188.55  | 192.42 | 119.52 | 136.50 | 154.10 | 260.03  |
| cysNC                      | 2.7.1.25,<br>2.7.7.4  | ko:K00955           | 244.19 | 248.57 | 291.25 | 308.07 | 280.98  | 302.47 | 334.25 | 268.03 | 281.80 | 326.23  |
| cysH                       | 1.8.4.10,<br>1.8.4.8  | ko:K00390           | 228.23 | 242.78 | 229.42 | 208.17 | 178.93  | 184.22 | 98.62  | 104.02 | 85.24  | 322.82  |
| cysI                       | 1.8.1.2               | ko:K00381           | 168.08 | 192.67 | 200.61 | 159.38 | 318.15  | 243.53 | 152.96 | 179.19 | 167.68 | 334.48  |
| cysK                       | 2.5.1.47              | ko:K01738           | 209.08 | 265.00 | 232.30 | 216.44 | 343.92  | 195.33 | 253.32 | 181.51 | 150.05 | 324.94  |
| cysB                       | 2.5.1.47              | ko:K01738           | 104.86 | 150.10 | 131.58 | 132.66 | 311.22  | 161.42 | 153.05 | 159.09 | 131.32 | 285.72  |
| metY                       | 2.5.1.47,<br>2.5.1.49 | ko:K01738,ko:K01740 | 63.11  | 34.06  | 21.23  | 32.68  | 64.78   | 121.48 | 53.56  | 29.40  | 13.23  | 68.33   |
| metB                       | 2.5.1.48              | ko:K01739,ko:K10764 | 190.95 | 180.75 | 203.83 | 156.26 | 245.93  | 175.63 | 181.59 | 168.62 | 152.47 | 204.50  |
| tauE                       | -                     | ko:K07090           | 366.92 | 500.96 | 413.86 | 465.04 | 882.46  | 441.53 | 455.18 | 418.83 | 438.23 | 834.56  |
| <b>NITROGEN METABOLISM</b> |                       |                     |        |        |        |        |         |        |        |        |        |         |
| narK                       | -                     | ko:K02575           | 336.59 | 242.73 | 223.98 | 260.31 | 593.37  | 507.37 | 241.58 | 274.29 | 341.39 | 607.64  |
| narG                       | 1.7.5.1               | ko:K00370           | 426.64 | 310.90 | 325.53 | 308.98 | 849.41  | 726.47 | 329.42 | 358.03 | 460.32 | 742.48  |
| narH                       | 1.7.5.1               | ko:K00371           | 417.66 | 308.04 | 213.53 | 162.18 | 243.19  | 568.72 | 232.50 | 197.08 | 319.39 | 241.52  |
| narI                       | 1.7.5.1               | ko:K00374           | 199.28 | 214.44 | 165.76 | 158.03 | 360.06  | 242.19 | 179.18 | 103.64 | 164.86 | 393.78  |
| amt                        | -                     | ko:K03320           | 348.52 | 316.11 | 353.24 | 300.33 | 489.69  | 321.87 | 324.45 | 306.66 | 359.41 | 455.64  |
| urtA                       | -                     | ko:K11959           | 211.22 | 258.97 | 229.60 | 610.15 | 539.81  | 272.51 | 263.95 | 272.96 | 391.64 | 501.02  |
| urtB                       | -                     | ko:K11960           | 161.40 | 262.50 | 222.14 | 205.60 | 743.87  | 238.89 | 229.67 | 176.50 | 198.51 | 679.65  |
| urtC                       | -                     | ko:K11961           | 316.30 | 275.29 | 284.55 | 308.18 | 690.70  | 399.81 | 341.77 | 282.84 | 269.95 | 499.94  |
| urtD                       | -                     | ko:K11962           | 235.78 | 157.36 | 195.71 | 232.29 | 537.15  | 212.85 | 192.58 | 206.03 | 216.39 | 444.39  |
| urtE                       | -                     | ko:K11963           | 169.84 | 194.62 | 160.00 | 113.95 | 298.55  | 176.47 | 163.00 | 168.44 | 136.08 | 284.41  |
| ureA                       | 3.5.1.5               | ko:K01430,ko:K14048 | 380.25 | 381.13 | 311.83 | 231.61 | 431.45  | 302.06 | 285.35 | 374.61 | 302.13 | 548.91  |
| ureB                       | 3.5.1.5               | ko:K01429           | 362.31 | 349.66 | 434.71 | 417.01 | 1310.70 | 442.39 | 312.11 | 384.92 | 460.28 | 1025.02 |
| ureC                       | 3.5.1.5               | ko:K01428           | 129.51 | 187.20 | 113.93 | 100.96 | 236.67  | 129.96 | 173.41 | 133.65 | 225.49 | 314.17  |

|                                |                       |           |         |         |         |         |         |         |         |         |         |         |
|--------------------------------|-----------------------|-----------|---------|---------|---------|---------|---------|---------|---------|---------|---------|---------|
| ureD                           | -                     | ko:K03190 | 233.86  | 294.89  | 283.34  | 321.26  | 712.34  | 294.34  | 234.07  | 264.71  | 342.21  | 771.53  |
| ureE                           | -                     | ko:K03187 | 151.30  | 167.88  | 133.89  | 125.08  | 264.94  | 129.14  | 168.57  | 154.83  | 168.71  | 268.19  |
| ureF                           | -                     | ko:K03188 | 653.53  | 868.73  | 1076.56 | 891.53  | 910.83  | 749.65  | 830.09  | 898.87  | 815.54  | 888.04  |
| ureG                           | -                     | ko:K03189 | 116.47  | 118.29  | 118.86  | 92.60   | 143.78  | 117.96  | 87.40   | 85.08   | 63.46   | 139.90  |
| glnA                           | 6.3.1.2               | ko:K01915 | 2152.62 | 1884.52 | 2052.98 | 2412.65 | 2098.73 | 2293.87 | 1813.02 | 2430.57 | 2100.89 | 2220.85 |
| gltB                           | 1.4.1.13,<br>1.4.1.14 | ko:K00265 | 549.93  | 762.52  | 648.31  | 531.61  | 494.64  | 504.88  | 794.02  | 612.96  | 542.00  | 566.72  |
| gltD                           | 1.4.1.13,<br>1.4.1.14 | ko:K00266 | 130.97  | 194.38  | 150.78  | 108.52  | 220.85  | 183.82  | 114.11  | 144.88  | 137.23  | 259.05  |
| gdh2                           | 1.4.1.2               | ko:K15371 | 322.86  | 328.59  | 381.62  | 404.21  | 731.29  | 310.45  | 325.29  | 340.00  | 416.73  | 704.62  |
|                                |                       |           | #N/A    | #N/A    | #N/A    | #N/A    | #N/A    | #N/A    | #N/A    | #N/A    | #N/A    | #N/A    |
| <b>CATION TRANSPORTERS</b>     |                       |           |         |         |         |         |         |         |         |         |         |         |
| pstS                           | -                     | ko:K02040 | 708.65  | 507.85  | 615.81  | 726.01  | 356.15  | 488.82  | 347.30  | 457.67  | 470.95  | 392.89  |
| pstB                           | 3.6.3.27              | ko:K02036 | 602.27  | 657.59  | 613.22  | 659.27  | 2004.64 | 510.30  | 584.92  | 566.58  | 627.98  | 1587.16 |
| pstA                           | -                     | ko:K02038 | 244.79  | 276.12  | 219.42  | 217.63  | 593.89  | 240.44  | 265.80  | 220.65  | 245.69  | 485.67  |
| pstC                           | -                     | ko:K02037 | 213.73  | 198.24  | 219.36  | 182.37  | 549.71  | 242.96  | 197.39  | 177.85  | 207.80  | 478.96  |
| znuB                           | -                     | ko:K09816 | 291.26  | 267.86  | 300.96  | 294.33  | 446.63  | 414.32  | 341.58  | 295.81  | 256.66  | 434.01  |
| znuC                           | -                     | ko:K09817 | 216.86  | 221.01  | 242.90  | 146.39  | 360.72  | 234.47  | 286.18  | 187.42  | 180.91  | 391.30  |
| znuA                           | -                     | ko:K09815 | 151.76  | 169.51  | 163.71  | 142.83  | 252.03  | 154.52  | 157.57  | 157.76  | 171.45  | 275.85  |
| afuC                           | 3.6.3.30              | ko:K02010 | 117.49  | 168.38  | 156.49  | 170.82  | 274.00  | 157.25  | 186.14  | 133.71  | 147.27  | 210.43  |
| afuB                           | -                     | ko:K02011 | 132.31  | 127.72  | 134.81  | 108.45  | 203.70  | 143.10  | 106.77  | 147.32  | 160.01  | 226.35  |
| afuA                           | -                     | ko:K02012 | 271.18  | 159.88  | 204.31  | 3629.76 | 256.29  | 492.60  | 147.24  | 158.68  | 114.84  | 250.42  |
| modC                           | 3.6.3.29              | ko:K02017 | 234.13  | 284.31  | 237.78  | 232.19  | 414.97  | 309.83  | 236.99  | 206.29  | 212.81  | 500.62  |
| modA                           | -                     | ko:K02020 | 228.58  | 441.16  | 335.50  | 171.91  | 340.86  | 301.54  | 742.09  | 597.15  | 319.77  | 337.40  |
| modB                           | -                     | ko:K02018 | 258.58  | 260.80  | 272.29  | 161.23  | 583.93  | 316.58  | 246.58  | 188.31  | 232.14  | 503.44  |
| <b>AMINO ACID TRANSPORTERS</b> |                       |           |         |         |         |         |         |         |         |         |         |         |
| aapJ                           | -                     | ko:K09969 | 523.21  | 368.92  | 540.90  | 476.17  | 333.11  | 549.30  | 414.31  | 529.60  | 572.82  | 340.21  |
| aapQ                           | -                     | ko:K09970 | 80.55   | 109.44  | 95.99   | 59.68   | 169.79  | 113.16  | 98.73   | 96.34   | 80.11   | 173.95  |
| aapM                           | -                     | ko:K09971 | 358.27  | 288.57  | 324.55  | 350.29  | 269.68  | 553.85  | 382.65  | 337.06  | 442.10  | 306.34  |

|              |          |                                         |         |         |         |         |         |         |         |         |         |         |
|--------------|----------|-----------------------------------------|---------|---------|---------|---------|---------|---------|---------|---------|---------|---------|
| aapP         | 3.6.3.21 | 294.0430<br>294.048                     | 326.51  | 318.94  | 265.39  | 472.46  | 333.15  | 276.28  | 245.18  | 308.21  |         |         |
| livK         | -        | ko:K01999                               | 1804.40 | 1758.04 | 1871.54 | 1751.35 | 2272.25 | 2283.23 | 1924.65 | 1580.48 | 1692.67 | 2364.16 |
| livH         | -        | ko:K01997                               | 2403.54 | 2299.66 | 2496.02 | 2116.92 | 3309.98 | 3178.05 | 2483.24 | 2134.48 | 2262.17 | 3528.17 |
| livM         | -        | ko:K01998                               | 1390.87 | 1600.97 | 1543.83 | 1518.96 | 2318.26 | 1513.61 | 1674.03 | 1534.76 | 1608.25 | 2410.49 |
| livG         | -        | 3042.527<br>3042.531                    | 3202.50 | 3175.79 | 2915.56 | 5762.20 | 3289.63 | 3325.68 | 2876.25 | 3280.91 |         |         |
| livF         | -        | ko:K01996                               | 2545.09 | 2817.73 | 2898.32 | 2524.77 | 5010.06 | 3057.55 | 2516.52 | 2493.49 | 2668.78 | 4809.97 |
| ABC.P<br>A.S | 3.6.3.21 | ko:K02028,ko:K02029,ko:K02030,ko:K09972 | 194.90  | 215.80  | 181.47  | 135.31  | 215.51  | 194.74  | 143.97  | 110.64  | 167.99  | 250.57  |
| ABC.P<br>A.S | -        | ko:K02029,ko:K02030                     | 203.43  | 234.13  | 204.89  | 235.02  | 261.17  | 345.24  | 220.46  | 246.10  | 204.54  | 278.60  |
| ABC.P<br>A.S | -        | ko:K02030                               | 60.44   | 77.62   | 72.81   | 63.45   | 95.68   | 100.40  | 75.88   | 64.10   | 64.19   | 129.76  |
| ABC.P<br>A.S | -        | ko:K02030,ko:K02424                     | 71.69   | 74.58   | 74.34   | 71.57   | 83.06   | 104.82  | 79.87   | 72.35   | 72.40   | 113.08  |
| HOMEOSTASIS  |          |                                         |         |         |         |         |         |         |         |         |         |         |
| kefA         | -        | ko:K05802                               | 588.82  | 532.83  | 470.92  | 544.88  | 634.58  | 565.46  | 483.64  | 572.19  | 522.17  | 513.03  |
| kefBC        | -        | ko:K03455,ko:K11745,ko:K11747           | 89.84   | 128.20  | 106.55  | 57.40   | 168.34  | 127.00  | 83.98   | 73.76   | 105.77  | 161.55  |
| trkH         | -        | ko:K03498                               | 237.92  | 257.11  | 206.13  | 158.30  | 243.82  | 170.25  | 166.54  | 175.38  | 185.89  | 300.44  |
| trkA         | -        | ko:K03499                               | 237.88  | 248.20  | 237.60  | 175.94  | 372.60  | 261.94  | 232.09  | 214.20  | 202.08  | 382.21  |
| mrpA         | -        | ko:K05566                               | 135.47  | 209.11  | 123.89  | 164.16  | 367.40  | 148.95  | 137.80  | 156.60  | 140.91  | 312.00  |
| mrpB         | -        | ko:K05566                               | 339.61  | 402.38  | 270.19  | 214.40  | 303.85  | 479.00  | 357.66  | 260.05  | 213.74  | 271.82  |
| mrpC         | -        | ko:K05567                               | 158.93  | 177.83  | 156.55  | 145.73  | 452.14  | 231.41  | 172.19  | 121.68  | 182.42  | 348.95  |
| mrpD         | -        | ko:K05568                               | 591.14  | 542.26  | 479.98  | 553.48  | 924.95  | 587.42  | 529.63  | 493.84  | 592.71  | 766.23  |
| mrpE         | -        | ko:K05569                               | 120.81  | 127.15  | 135.10  | 129.40  | 234.22  | 143.14  | 164.43  | 121.92  | 149.60  | 217.01  |
| mrpD         | 1.6.5.3  | 294.8986<br>294.90                      | 404.57  | 393.66  | 286.04  | 496.38  | 428.66  | 510.75  | 410.88  | 359.17  |         |         |
| mrpF         | -        | ko:K05570                               | 94.82   | 170.36  | 118.21  | 169.44  | 222.98  | 173.70  | 129.88  | 112.69  | 112.26  | 285.92  |
| mrpG         | -        | ko:K05571                               | 157.51  | 135.41  | 150.39  | 140.39  | 386.93  | 124.90  | 148.58  | 116.42  | 108.78  | 409.51  |
| hppA         | 3.6.1.1  | ko:K15987                               | 50.40   | 79.04   | 57.26   | 42.58   | 153.52  | 92.72   | 62.29   | 57.84   | 80.76   | 121.96  |

| AMINO ACID SYNTHESIS |                       |                     |         |         |         |         |         |         |         |         |         |         |
|----------------------|-----------------------|---------------------|---------|---------|---------|---------|---------|---------|---------|---------|---------|---------|
| dat                  | 2.6.1.21              | ko:K00824           | 135.74  | 148.49  | 110.52  | 113.50  | 221.89  | 147.11  | 135.14  | 109.74  | 152.59  | 250.87  |
| alr                  | 5.1.1.1               | ko:K01775           | 227.21  | 196.17  | 263.39  | 216.53  | 278.25  | 226.34  | 256.06  | 223.58  | 214.96  | 391.93  |
| ald                  | 1.4.1.1               | ko:K00259           | 696.53  | 411.30  | 484.42  | 632.30  | 499.94  | 586.48  | 383.86  | 478.92  | 466.09  | 583.49  |
| ectA                 | 2.3.1.178             | ko:K06718           | 176.33  | 179.51  | 233.12  | 185.69  | 317.08  | 189.05  | 200.38  | 194.62  | 190.99  | 296.13  |
| ectB                 | 2.6.1.19,<br>2.6.1.76 | ko:K00823,ko:K00836 | 61.37   | 44.85   | 43.34   | 65.42   | 77.99   | 49.77   | 78.58   | 77.42   | 26.12   | 91.36   |
| ectC                 | 4.2.1.108             | ko:K06720           | 122.74  | 108.00  | 115.66  | 93.59   | 209.73  | 114.53  | 115.41  | 86.23   | 99.75   | 214.01  |
| ectD                 | 1.14.11.5<br>5        | ko:K10674           | 78.05   | 80.62   | 83.57   | 87.58   | 103.84  | 107.00  | 95.67   | 102.84  | 82.69   | 137.32  |
| gltB                 | 1.4.1.13,<br>1.4.1.14 | ko:K00265           | 549.93  | 762.52  | 648.31  | 531.61  | 494.64  | 504.88  | 794.02  | 612.96  | 542.00  | 566.72  |
| gltD                 | 1.4.1.13,<br>1.4.1.14 | ko:K00266           | 130.97  | 194.38  | 150.78  | 108.52  | 220.85  | 183.82  | 114.11  | 144.88  | 137.23  | 259.05  |
| glnA                 | 6.3.1.2               | ko:K01915           | 2152.62 | 1884.52 | 2052.98 | 2412.65 | 2098.73 | 2293.87 | 1813.02 | 2430.57 | 2100.89 | 2220.85 |
| argJ                 | 2.3.1.1,2,<br>3.1.35  | ko:K00620           | 436.93  | 378.09  | 380.21  | 368.18  | 399.09  | 495.03  | 422.89  | 390.24  | 407.67  | 476.60  |
| argD                 | 2.6.1.11,<br>2.6.1.17 | ko:K00821           | 341.63  | 372.66  | 345.82  | 414.66  | 543.48  | 363.99  | 305.87  | 338.06  | 424.57  | 521.51  |
| argB                 | 2.7.2.8               | ko:K00930           | 407.22  | 434.77  | 414.83  | 393.39  | 495.74  | 525.93  | 408.15  | 386.67  | 385.57  | 488.39  |
| argC                 | 1.2.1.38              | ko:K00145           | 2054.20 | 1217.60 | 1769.92 | 2105.31 | 352.23  | 1490.17 | 1576.89 | 1507.11 | 1520.43 | 333.42  |
| proA                 | 1.2.1.41              | ko:K00147           | 212.36  | 200.12  | 229.28  | 275.17  | 348.07  | 266.19  | 200.94  | 181.14  | 227.53  | 338.14  |
| proB                 | 2.7.2.11              | ko:K00931           | 480.55  | 400.01  | 489.72  | 500.66  | 685.24  | 407.95  | 324.97  | 368.20  | 429.59  | 680.89  |
| proC                 | 1.5.1.2               | ko:K00286           | 135.73  | 184.78  | 221.03  | 171.86  | 324.23  | 219.19  | 164.74  | 163.20  | 164.42  | 403.32  |

**Table S5. Sample information of 16S rRNA gene amplicon datasets in which *Futaniales* was present.**

| SRA accession | Bioproject  | Biosample    | Env_biome                   | Env_feature                                      | Env_material                | Env_package            | Sample type       | Latitude  | Longitude | Relative_abundance |
|---------------|-------------|--------------|-----------------------------|--------------------------------------------------|-----------------------------|------------------------|-------------------|-----------|-----------|--------------------|
| SRR1948179    | PRJNA279913 | SAMN03449765 | bohai sea                   | marine sediment                                  | original soil sample        | added Sodium benzoate  | marine sediment   | 37.6      | 120.38    | 18.7611%           |
| SRR1133270    | PRJNA232457 | SAMN02586139 | coastal marsh               |                                                  | sediment                    |                        | coastal sediment  | 29.17407  | -90.64935 | 18.1571%           |
| SRR1948178    | PRJNA279913 | SAMN03449764 | bohai sea                   | marine sediment                                  | original soil sample        | added Sodium benzoate  | marine sediment   | 37.6      | 120.37    | 16.9267%           |
| SRR5178048    | PRJNA361424 | SAMN06233416 | marine                      | -                                                | sediment                    | marine metagenome      | marine sediment   | 21.18     | 72.1      | 7.9378%            |
| SRR1066770    | PRJNA229799 | SAMN02427080 | coastal saline soils Odisha | 16S rRNA gene sequence                           | 16S rRNA gene sequence      | MIGS/MIMS/MIMARKS.soil | soil              | 19.416667 | 85.066667 | 7.0822%            |
| ERR361767     | PRJEB4793   | SAMEA2242129 | a sewage plant              | a sewage plant for wastewater from oil reservoir | wastewater                  | wastewater/sludge      | wastewater/sludge | 21.0333   | 109.1     | 6.9061%            |
| SRR5468970    | PRJNA381927 | SAMN06820513 | ENVO:01000022               | ENVO:01001305                                    | ENVO:00002243               |                        | soil              | 29.4406   | -89.88492 | 6.4543%            |
| ERR713048     | PRJEB8105   | SAMEA3182221 | wastewater treatment plant  | wastewater treatment plant                       | activated sludge            | wastewater/sludge      | wastewater/sludge | 55.50727  | 12.14549  | 5.6226%            |
| SRR8359316    | PRJNA510850 | SAMN10617124 |                             |                                                  | activated sludge            |                        | wastewater/sludge | 36.070613 | 120.42273 | 4.8457%            |
| SRR3289600    | PRJNA316054 | SAMN04577806 | marine                      | -                                                | sediment                    |                        | marine sediment   | 21.4      | 117.83    | 4.1566%            |
| SRR2954155    | PRJNA300310 | SAMN04218941 | coast                       | marsh                                            | sediment                    | sediment metagenome    | coastal sediment  | 29.2801   | -89.97583 | 3.4662%            |
| SRR5478611    | PRJNA384096 | SAMN06828347 | ENVO:01000022               | ENVO:01001305                                    | ENVO:00002243               |                        | soil              | 29.44105  | -89.93337 | 3.2073%            |
| SRR1133196    | PRJNA232457 | SAMN02586135 | coastal marsh               |                                                  | sediment                    |                        | coastal sediment  | 29.45437  | -89.77008 | 2.9762%            |
| SRR5478617    | PRJNA384096 | SAMN06828341 | ENVO:01000022               | ENVO:01001305                                    | ENVO:00002243               |                        | soil              | 29.44105  | -89.93337 | 2.7445%            |
| SRR6457335    | PRJNA429259 | SAMN08327666 |                             |                                                  | seawater                    |                        | marine water      | 28.5      | -87.51    | 2.5993%            |
| SRR6206202    | PRJNA415515 | SAMN07828062 |                             |                                                  | wastewater treatment sludge | wastewater/sludge      | wastewater/sludge | 34.27     | 108.54    | 2.5198%            |
| SRR5478587    | PRJNA384096 | SAMN06828371 | ENVO:01000022               | ENVO:01001305                                    | ENVO:00002243               |                        | soil              | 29.44105  | -89.93337 | 2.2916%            |
| SRR5022896    | PRJNA330773 | SAMN05435905 | -                           | -                                                | -                           |                        | freshwater        | -32.06    | 115.83    | 2.0651%            |
| SRR5469006    | PRJNA381927 | SAMN06820477 | ENVO:01000022               | ENVO:01001305                                    | ENVO:00002243               |                        | soil              | 29.4406   | -89.88492 | 1.7964%            |

|                |                 |                  |               |                  |                                   |                        |                     |          |           |         |
|----------------|-----------------|------------------|---------------|------------------|-----------------------------------|------------------------|---------------------|----------|-----------|---------|
| SRR85058<br>83 | PRJNA510<br>520 | SAMN107<br>97396 |               |                  | sediment                          |                        | marine<br>sediment  | -75.003  | 165.012   | 1.6280% |
| SRR54786<br>47 | PRJNA384<br>096 | SAMN068<br>28311 | ENVO:01000022 | ENVO:01001305    | ENVO:00002243                     |                        | soil                | 29.44105 | -89.93337 | 1.6006% |
| SRR19480<br>31 | PRJNA279<br>913 | SAMN034<br>49762 | bohais sea    | marine sediment  | original soil sample added pyrene |                        | marine<br>sediment  | 37.6     | 120.35    | 1.4995% |
| SRR31569<br>08 | PRJNA310<br>143 | SAMN044<br>81069 | -             | -                | sediment                          |                        | coastal<br>sediment | 6.542195 | 3.520752  | 1.4590% |
| SRR29538<br>88 | PRJNA300<br>310 | SAMN042<br>18727 | coast         | marsh            | sediment                          | sediment<br>metagenome | coastal<br>sediment | 29.30231 | -90.59848 | 1.3320% |
| SRR86090<br>02 | PRJNA523<br>734 | SAMN109<br>86767 | marine        |                  | Pyropia                           |                        | host-<br>associated | 30.7     | 121.28    | 1.3058% |
| SRR75472<br>52 | PRJNA480<br>575 | SAMN096<br>41961 |               |                  | Scrippsiella                      |                        | host-<br>associated | 22.49    | 113.99    | 1.2779% |
| SRR38840<br>70 | PRJNA328<br>594 | SAMN053<br>75666 | marine        | -                | Water                             |                        | marine water        | 19.45054 | -120.0608 | 1.2688% |
| DRR06113<br>9  | PRJDB484<br>9   | SAMD000<br>51898 | sediment      | tsunami sediment | -                                 |                        | marine<br>sediment  | 38.25    | 141.14    | 1.2439% |
| SRR20805<br>68 | PRJNA286<br>014 | SAMN037<br>83534 | Terrestrial   | soil             | soil                              |                        | soil                | 18.32428 | -65.8135  | 1.0699% |
| SRR54785<br>93 | PRJNA384<br>096 | SAMN068<br>28365 | ENVO:01000022 | ENVO:01001305    | ENVO:00002243                     |                        | soil                | 29.44105 | -89.93337 | 1.0556% |
| SRR86090<br>22 | PRJNA523<br>734 | SAMN109<br>86748 | marine        |                  | Pyropia                           |                        | host-<br>associated | 30.7     | 121.28    | 1.0454% |
| SRR65176<br>12 | PRJNA431<br>095 | SAMN083<br>84074 | Wetland       |                  | sediment                          |                        | coastal<br>sediment | -32.9483 | 151.83472 | 1.0229% |
| SRR64572<br>16 | PRJNA429<br>259 | SAMN083<br>27894 |               |                  | seawater                          |                        | marine water        | 28.53    | -87.5     | 0.9203% |
| SRR64572<br>33 | PRJNA429<br>259 | SAMN083<br>27730 |               |                  | seawater                          |                        | marine water        | 27       | -89.99    | 0.8445% |
| SRR58608<br>23 | PRJNA395<br>500 | SAMN074<br>07697 | Wetland       | Coastal wetland  | Sediment                          |                        | coastal<br>sediment | 22.49    | 114.03    | 0.8276% |
| SRR31569<br>14 | PRJNA310<br>143 | SAMN044<br>81074 | -             | -                | sediment                          |                        | coastal<br>sediment | 6.542195 | 3.520752  | 0.7658% |
| SRR64574<br>09 | PRJNA429<br>259 | SAMN083<br>27756 |               |                  | seawater                          |                        | marine water        | 26.91    | -89.07    | 0.7569% |
| SRR75472<br>25 | PRJNA480<br>575 | SAMN096<br>41961 |               |                  | Scrippsiella                      |                        | host-<br>associated | 22.49    | 113.99    | 0.7548% |
| SRR54785<br>73 | PRJNA384<br>096 | SAMN068<br>28385 | ENVO:01000022 | ENVO:01001305    | ENVO:00002243                     |                        | soil                | 29.44105 | -89.93337 | 0.7372% |
| SRR86090<br>24 | PRJNA523<br>734 | SAMN109<br>86746 | marine        |                  | Pyropia                           |                        | host-<br>associated | 30.7     | 121.28    | 0.7244% |
| SRR58608<br>20 | PRJNA395<br>500 | SAMN074<br>07698 | Wetland       | Coastal wetland  | Sediment                          |                        | coastal<br>sediment | 22.49    | 114.03    | 0.7051% |

|                |                 |                  |                               |                            |                                   |                           |                         |               |           |         |
|----------------|-----------------|------------------|-------------------------------|----------------------------|-----------------------------------|---------------------------|-------------------------|---------------|-----------|---------|
| SRR53132<br>21 | PRJNA377<br>204 | SAMN064<br>58653 | lake                          | -                          | sediment                          |                           | freshwater<br>sediment  | 37.19         | 96.81     | 0.6783% |
| SRR19480<br>37 | PRJNA279<br>913 | SAMN034<br>49763 | bohais sea                    | marine sediment            | original soil sample added pyrene |                           | marine<br>sediment      | 37.6          | 120.36    | 0.6781% |
| SRR37362<br>05 | PRJNA326<br>707 | SAMN052<br>84610 | estuarine biome               |                            | sediment                          | aquatic metagenome        | coastal<br>sediment     | 24.423        | 118.031   | 0.6431% |
| ERR71307<br>9  | PRJEB810<br>5   | SAMEA31<br>82252 | wastewater<br>treatment plant | wastewater treatment plant | activated sludge                  | wastewater/sludge         | wastewater/sl<br>udge   | 55.95336      | 9.12846   | 0.6406% |
| SRR15661<br>19 | PRJNA260<br>373 | SAMN030<br>20622 | Terrestrial                   | land                       | soil                              | solid waste<br>metagenome | soil                    | -3.4246       | 36.6796   | 0.6207% |
| SRR15620<br>63 | PRJNA259<br>818 | SAMN030<br>14285 | Solid waste                   | Soil                       | Soil                              |                           | soil                    | -3.44         | 36.68     | 0.6202% |
| SRR56416<br>66 | PRJNA388<br>861 | SAMN071<br>87879 | Terrestrial                   |                            | soil                              |                           | soil                    | 37.7          | 117.5     | 0.6188% |
| DRR06113<br>6  | PRJDB484<br>9   | SAMD000<br>51895 | sediment                      | tsunami sediment           | -                                 |                           | marine<br>sediment      | 38.25         | 141.14    | 0.6134% |
| SRR31568<br>14 | PRJNA310<br>143 | SAMN044<br>81075 | -                             | -                          | sediment                          |                           | coastal<br>sediment     | 6.542195      | 3.520752  | 0.6116% |
| SRR56416<br>64 | PRJNA388<br>861 | SAMN071<br>87869 | Terrestrial                   |                            | soil                              |                           | soil                    | 37.7          | 117.5     | 0.6108% |
| SRR54786<br>18 | PRJNA384<br>096 | SAMN068<br>28340 | ENVO:01000022                 | ENVO:01001305              | ENVO:00002243                     |                           | soil                    | 29.44105      | -89.93337 | 0.6097% |
| SRR31569<br>04 | PRJNA310<br>143 | SAMN044<br>81068 | -                             | -                          | sediment                          |                           | coastal<br>sediment     | 6.542195      | 3.520752  | 0.5929% |
| SRR20436<br>54 | PRJNA284<br>669 | SAMN037<br>29528 | lake                          | lake                       | sediment                          |                           | hypersaline<br>sediment | 46.36         | 25.05     | 0.5870% |
| SRR63754<br>11 | PRJNA421<br>083 | SAMN081<br>76556 | marine                        | marine                     | Sediment                          |                           | marine<br>sediment      | 20.91589<br>8 | 70.362852 | 0.5852% |
| SRR64572<br>29 | PRJNA429<br>259 | SAMN083<br>27565 |                               |                            | seawater                          |                           | marine water            | 28.04         | -87.33    | 0.5793% |
| SRR53132<br>33 | PRJNA377<br>204 | SAMN064<br>58641 | lake                          | -                          | sediment                          |                           | freshwater<br>sediment  | 37.19         | 96.81     | 0.5613% |
| SRR64575<br>06 | PRJNA429<br>259 | SAMN083<br>27768 |                               |                            | seawater                          |                           | marine water            | 26.99         | -87.98    | 0.5583% |
| SRR86090<br>31 | PRJNA523<br>734 | SAMN109<br>86755 | marine                        |                            | Pyropia                           |                           | host-<br>associated     | 30.7          | 121.28    | 0.5557% |
| SRR58608<br>68 | PRJNA395<br>500 | SAMN074<br>07721 | Wetland                       | Coastal wetland            | Sediment                          |                           | coastal<br>sediment     | 22.49         | 114.03    | 0.5551% |
| SRR31569<br>09 | PRJNA310<br>143 | SAMN044<br>81070 | -                             | -                          | sediment                          |                           | coastal<br>sediment     | 6.542195      | 3.520752  | 0.5439% |
| SRR63962<br>23 | PRJNA421<br>849 | SAMN082<br>00910 |                               |                            | sediments                         |                           | marine<br>sediment      | 19.99857<br>8 | 110.60909 | 0.5406% |
| SRR53132<br>45 | PRJNA377<br>204 | SAMN064<br>58629 | lake                          | -                          | sediment                          |                           | freshwater<br>sediment  | 37.19         | 96.81     | 0.5342% |



|            |             |              |                 |                                     |                                 |                          |                       |           |           |         |
|------------|-------------|--------------|-----------------|-------------------------------------|---------------------------------|--------------------------|-----------------------|-----------|-----------|---------|
| SRR3497608 | PRJNA320997 | SAMN04961898 | -               | -                                   | soil                            |                          | soil                  | 43.5069   | 4.4547    | 0.5170% |
| SRR6457236 | PRJNA429259 | SAMN08327729 |                 |                                     | seawater                        |                          | marine water          | 27        | -89.99    | 0.4913% |
| SRR6435252 | PRJNA428033 | SAMN08280932 |                 |                                     | sediment                        |                          | coastal sediment      | 13.32222  | 100.26365 | 0.4868% |
| SRR6457310 | PRJNA429259 | SAMN08327844 |                 |                                     | seawater                        |                          | marine water          | 27.51     | -89.01    | 0.4816% |
| SRR6457112 | PRJNA429259 | SAMN08327643 |                 |                                     | seawater                        |                          | marine water          | 27        | -85.99    | 0.4708% |
| SRR6457237 | PRJNA429259 | SAMN08327728 |                 |                                     | seawater                        |                          | marine water          | 27        | -89.99    | 0.4666% |
| SRR8609016 | PRJNA523734 | SAMN10986762 | marine          |                                     | Pyropia                         |                          | host-associated       | 30.7      | 121.28    | 0.4626% |
| SRR8609019 | PRJNA523734 | SAMN10986761 | marine          |                                     | Pyropia                         |                          | host-associated       | 30.7      | 121.28    | 0.4578% |
| SRR6457551 | PRJNA429259 | SAMN08327740 |                 |                                     | seawater                        |                          | marine water          | 26.98     | -89.98    | 0.4526% |
| SRR8609023 | PRJNA523734 | SAMN10986749 | marine          |                                     | Pyropia                         |                          | host-associated       | 30.7      | 121.28    | 0.4510% |
| SRR6457309 | PRJNA429259 | SAMN08327845 |                 |                                     | seawater                        |                          | marine water          | 27.51     | -89.01    | 0.4410% |
| SRR8359317 | PRJNA510850 | SAMN10617125 |                 |                                     | activated sludge                |                          | wastewater/sludge     | 36.070337 | 120.41761 | 0.4402% |
| ERR2597124 | PRJEB26931  | SAMEA4688722 | human           | stomach                             | gastric mucosa                  | host-associated          | host-associated       | 39.54     | 116.16    | 0.4314% |
| SRR7084774 | PRJNA449342 | SAMN09002943 |                 |                                     | Petroleum-contaminated sediment |                          | coastal sediment      | 29.29     | -89.91    | 0.4290% |
| SRR2349961 | PRJNA295127 | SAMN04044562 | brackish lagoon | Natural zone of ecological interest | microbial mat                   | microbial mat metagenome | microbial mat/biofilm | 43.45257  | 5.230085  | 0.4220% |
| SRR5860898 | PRJNA395500 | SAMN07407728 | Wetland         | Coastal wetland                     | Sediment                        |                          | coastal sediment      | 22.49     | 114.03    | 0.4125% |
| SRR3736135 | PRJNA326707 | SAMN05284547 | estuarine biome |                                     | sediment                        | aquatic metagenome       | coastal sediment      | 24.465    | 117.1     | 0.4032% |
| SRR6457234 | PRJNA429259 | SAMN08327727 |                 |                                     | seawater                        |                          | marine water          | 27        | -89.99    | 0.3897% |
| DRR061137  | PRJDB4849   | SAMD00051896 | sediment        | tsunami sediment                    | -                               |                          | marine sediment       | 38.25     | 141.14    | 0.3847% |
| SRR6457105 | PRJNA429259 | SAMN08327809 |                 |                                     | seawater                        |                          | marine water          | 26.95     | -87.53    | 0.3802% |
| SRR8599968 | PRJNA522679 | SAMN10956164 | marine          |                                     | Pyropia                         |                          | host-associated       | 35.61     | 119.34    | 0.3800% |
| SRR6457318 | PRJNA429259 | SAMN08327850 |                 |                                     | seawater                        |                          | marine water          | 27.5      | -89       | 0.3799% |

|            |             |              |                            |                                     |                                 |                          |                       |          |          |         |
|------------|-------------|--------------|----------------------------|-------------------------------------|---------------------------------|--------------------------|-----------------------|----------|----------|---------|
| SRR1980853 | PRJNA281530 | SAMN03491550 | marine pelagic biome       | marine water body                   | water                           |                          | marine water          | 13.96    | -116.57  | 0.3721% |
| SRR6457384 | PRJNA429259 | SAMN08327829 |                            |                                     | seawater                        |                          | marine water          | 26.99    | -89.49   | 0.3629% |
| SRR8284947 | PRJNA508441 | SAMN10522681 |                            |                                     | Coastal water                   |                          | coastal water         | 22.5     | 114      | 0.3590% |
| ERR713217  | PRJEB8105   | SAMEA3182390 | wastewater treatment plant | wastewater treatment plant          | activated sludge                | wastewater/sludge        | wastewater/sludge     | 55.50727 | 12.14549 | 0.3558% |
| SRR6457311 | PRJNA429259 | SAMN08327843 |                            |                                     | seawater                        |                          | marine water          | 27.51    | -89.01   | 0.3538% |
| SRR6457122 | PRJNA429259 | SAMN08327512 |                            |                                     | seawater                        |                          | marine water          | 28       | -87.5    | 0.3530% |
| SRR1303761 | PRJNA248779 | SAMN02800856 | oil well16                 | oil well                            | water                           |                          | oil-related           | 30.4     | 112.7    | 0.3394% |
| SRR1303705 | PRJNA248705 | SAMN02800801 | lake environment53         | lake                                | sediment                        |                          | freshwater sediment   | 37.5     | 95.3     | 0.3256% |
| ERR713108  | PRJEB8105   | SAMEA3182281 | wastewater treatment plant | wastewater treatment plant          | activated sludge                | wastewater/sludge        | wastewater/sludge     | 55.95336 | 9.12846  | 0.3204% |
| SRR8285008 | PRJNA508441 | SAMN10522646 |                            |                                     | Coastal water                   |                          | coastal water         | 22.5     | 113.98   | 0.3154% |
| DRR028744  | PRJDB3419   | SAMD00024531 | coastal biome              | natural environment                 | water                           |                          | coastal water         | 29.95    | 121.92   | 0.3104% |
| SRR5313239 | PRJNA377204 | SAMN06458635 | lake                       | -                                   | sediment                        |                          | freshwater sediment   | 37.19    | 96.81    | 0.3056% |
| SRR1980854 | PRJNA281530 | SAMN03491551 | marine pelagic biome       | marine water body                   | water                           |                          | marine water          | 13.96    | -116.57  | 0.2930% |
| SRR2349870 | PRJNA295127 | SAMN04044562 | brackish lagoon            | Natural zone of ecological interest | microbial mat                   | microbial mat metagenome | microbial mat/biofilm | 43.45257 | 5.230085 | 0.2855% |
| SRR2001836 | PRJNA281978 | SAMN03565305 | activated sludge           | activated sludge                    | activated sludge                | wastewater/sludge        | wastewater/sludge     | 39.92    | 116.46   | 0.2850% |
| SRR6457235 | PRJNA429259 | SAMN08327726 |                            |                                     | seawater                        |                          | marine water          | 27       | -89.99   | 0.2840% |
| SRR7084779 | PRJNA449342 | SAMN09002950 |                            |                                     | Petroleum-contaminated sediment |                          | coastal sediment      | 29.29    | -89.91   | 0.2781% |
| SRR6457218 | PRJNA429259 | SAMN08327896 |                            |                                     | seawater                        |                          | marine water          | 28.53    | -87.5    | 0.2746% |
| SRR6457078 | PRJNA429259 | SAMN08327739 |                            |                                     | seawater                        |                          | marine water          | 26.98    | -89.98   | 0.2596% |
| SRR6457499 | PRJNA429259 | SAMN08327841 |                            |                                     | seawater                        |                          | marine water          | 27.51    | -89.01   | 0.2567% |
| SRR6457424 | PRJNA429259 | SAMN08327878 |                            |                                     | seawater                        |                          | marine water          | 28.01    | -87.51   | 0.2543% |
| SRR6457147 | PRJNA429259 | SAMN08327559 |                            |                                     | seawater                        |                          | marine water          | 28       | -87      | 0.2467% |

|                |                 |                  |                       |         |                                 |                        |               |           |         |
|----------------|-----------------|------------------|-----------------------|---------|---------------------------------|------------------------|---------------|-----------|---------|
| SRR70847<br>76 | PRJNA449<br>342 | SAMN090<br>02894 |                       |         | Petroleum-contaminated sediment | coastal<br>sediment    | 29.29         | -89.91    | 0.2450% |
| SRR64352<br>45 | PRJNA428<br>033 | SAMN082<br>80935 |                       |         | sediment                        | coastal<br>sediment    | 13.32222      | 100.26365 | 0.2420% |
| SRR85999<br>63 | PRJNA522<br>679 | SAMN109<br>56171 | marine                |         | Pyropia                         | host-<br>associated    | 35.61         | 119.34    | 0.2407% |
| SRR15620<br>59 | PRJNA259<br>818 | SAMN030<br>14285 | Solid waste           | Soil    | Soil                            | soil                   | -3.44         | 36.68     | 0.2372% |
| SRR64352<br>42 | PRJNA428<br>033 | SAMN082<br>80928 |                       |         | sediment                        | coastal<br>sediment    | 13.32222      | 100.26365 | 0.2367% |
| SRR29616<br>44 | PRJNA304<br>214 | SAMN042<br>96796 | deciduous<br>woodland | wetland | sediment                        | coastal<br>sediment    | 37.76694<br>4 | 119.16889 | 0.2324% |
| SRR86090<br>14 | PRJNA523<br>734 | SAMN109<br>86756 | marine                |         | Pyropia                         | host-<br>associated    | 30.7          | 121.28    | 0.2316% |
| SRR56416<br>63 | PRJNA388<br>861 | SAMN071<br>87871 | Terrestrial           |         | soil                            | soil                   | 37.7          | 117.5     | 0.2226% |
| SRR64572<br>17 | PRJNA429<br>259 | SAMN083<br>27895 |                       |         | seawater                        | marine water           | 28.53         | -87.5     | 0.2184% |
| SRR85999<br>11 | PRJNA522<br>679 | SAMN109<br>56221 | marine                |         | Pyropia                         | host-<br>associated    | 35.61         | 119.34    | 0.2170% |
| SRR31568<br>67 | PRJNA310<br>143 | SAMN044<br>81078 | -                     | -       | sediment                        | coastal<br>sediment    | 6.542195      | 3.520752  | 0.2168% |
| SRR53132<br>41 | PRJNA377<br>204 | SAMN064<br>58633 | lake                  | -       | sediment                        | freshwater<br>sediment | 37.19         | 96.81     | 0.2108% |
| SRR51715<br>52 | PRJNA360<br>666 | SAMN062<br>14480 | Terrestrial           | -       | soil                            | soil                   | 20.25         | 85.55     | 0.2079% |
| SRR64574<br>27 | PRJNA429<br>259 | SAMN083<br>27877 |                       |         | seawater                        | marine water           | 28.01         | -87.51    | 0.2065% |
| SRR64575<br>48 | PRJNA429<br>259 | SAMN083<br>27864 |                       |         | seawater                        | marine water           | 27.51         | -88       | 0.2041% |
| SRR85999<br>67 | PRJNA522<br>679 | SAMN109<br>56165 | marine                |         | Pyropia                         | host-<br>associated    | 35.61         | 119.34    | 0.2035% |
| SRR64571<br>04 | PRJNA429<br>259 | SAMN083<br>27808 |                       |         | seawater                        | marine water           | 26.95         | -87.53    | 0.2029% |
| SRR85999<br>22 | PRJNA522<br>679 | SAMN109<br>56197 | marine                |         | Pyropia                         | host-<br>associated    | 35.61         | 119.34    | 0.2029% |
| SRR85999<br>18 | PRJNA522<br>679 | SAMN109<br>56193 | marine                |         | Pyropia                         | host-<br>associated    | 35.61         | 119.34    | 0.1988% |
| SRR85999<br>24 | PRJNA522<br>679 | SAMN109<br>56195 | marine                |         | Pyropia                         | host-<br>associated    | 35.61         | 119.34    | 0.1975% |
| SRR51715<br>20 | PRJNA360<br>666 | SAMN062<br>14480 | Terrestrial           | -       | soil                            | soil                   | 20.25         | 85.55     | 0.1967% |
| SRR53132<br>23 | PRJNA377<br>204 | SAMN064<br>58651 | lake                  | -       | sediment                        | freshwater<br>sediment | 37.19         | 96.81     | 0.1957% |

|                |                 |                  |                         |                                        |                                 |                             |                          |          |          |         |
|----------------|-----------------|------------------|-------------------------|----------------------------------------|---------------------------------|-----------------------------|--------------------------|----------|----------|---------|
| SRR55286<br>86 | PRJNA385<br>860 | SAMN069<br>19907 |                         |                                        | sediment                        |                             | freshwater<br>sediment   | 37.15    | -78.17   | 0.1943% |
| SRR85999<br>37 | PRJNA522<br>679 | SAMN109<br>56219 | marine                  |                                        | Pyropia                         |                             | host-<br>associated      | 35.61    | 119.34   | 0.1937% |
| SRR85999<br>04 | PRJNA522<br>679 | SAMN109<br>56397 | marine                  |                                        | Pyropia                         |                             | host-<br>associated      | 35.61    | 119.34   | 0.1917% |
| SRR64571<br>78 | PRJNA429<br>259 | SAMN083<br>27778 |                         |                                        | seawater                        |                             | marine water             | 27       | -86.99   | 0.1913% |
| SRR82850<br>07 | PRJNA508<br>441 | SAMN105<br>22645 |                         |                                        | Coastal water                   |                             | coastal water            | 22.5     | 114      | 0.1911% |
| SRR64574<br>26 | PRJNA429<br>259 | SAMN083<br>27876 |                         |                                        | seawater                        |                             | marine water             | 28.01    | -87.51   | 0.1891% |
| SRR85999<br>49 | PRJNA522<br>679 | SAMN109<br>56407 | marine                  |                                        | Pyropia                         |                             | host-<br>associated      | 35.61    | 119.34   | 0.1888% |
| SRR86090<br>26 | PRJNA523<br>734 | SAMN109<br>86752 | marine                  |                                        | Pyropia                         |                             | host-<br>associated      | 30.7     | 121.28   | 0.1887% |
| SRR23499<br>42 | PRJNA295<br>127 | SAMN040<br>44563 | brackish lagoon         | Natural zone of ecological<br>interest | microbial mat                   | microbial mat<br>metagenome | microbial<br>mat/biofilm | 43.45257 | 5.230085 | 0.1885% |
| SRR85999<br>14 | PRJNA522<br>679 | SAMN109<br>56226 | marine                  |                                        | Pyropia                         |                             | host-<br>associated      | 35.61    | 119.34   | 0.1882% |
| SRR64572<br>70 | PRJNA429<br>259 | SAMN083<br>27824 |                         |                                        | seawater                        |                             | marine water             | 26.99    | -89.49   | 0.1879% |
| SRR64574<br>47 | PRJNA429<br>259 | SAMN083<br>27654 |                         |                                        | seawater                        |                             | marine water             | 28.5     | -87.52   | 0.1867% |
| SRR64571<br>07 | PRJNA429<br>259 | SAMN083<br>27807 |                         |                                        | seawater                        |                             | marine water             | 26.95    | -87.53   | 0.1840% |
| SRR86090<br>27 | PRJNA523<br>734 | SAMN109<br>86753 | marine                  |                                        | Pyropia                         |                             | host-<br>associated      | 30.7     | 121.28   | 0.1821% |
| SRR54609<br>68 | PRJNA383<br>082 | SAMN067<br>59285 |                         | Houxi midstream                        | water                           |                             | freshwater               | 24.66    | 118.03   | 0.1665% |
| SRR70844<br>72 | PRJNA449<br>342 | SAMN090<br>02890 |                         |                                        | Petroleum-contaminated sediment |                             | coastal<br>sediment      | 29.29    | -89.91   | 0.1657% |
| SRR64574<br>08 | PRJNA429<br>259 | SAMN083<br>27757 |                         |                                        | seawater                        |                             | marine water             | 26.91    | -89.07   | 0.1627% |
| SRR64572<br>83 | PRJNA429<br>259 | SAMN083<br>27830 |                         |                                        | seawater                        |                             | marine water             | 26.99    | -89.49   | 0.1625% |
| SRR19808<br>68 | PRJNA281<br>530 | SAMN034<br>91567 | marine pelagic<br>biome | marine water body                      | water                           | seawater<br>metagenome      | marine water             | 13.85    | -116.63  | 0.1440% |
| SRR23499<br>60 | PRJNA295<br>127 | SAMN040<br>44561 | brackish lagoon         | Natural zone of ecological<br>interest | microbial mat                   | microbial mat<br>metagenome | microbial<br>mat/biofilm | 43.45257 | 5.230085 | 0.1378% |
| SRR64575<br>09 | PRJNA429<br>259 | SAMN083<br>27767 |                         |                                        | seawater                        |                             | marine water             | 26.99    | -87.98   | 0.1375% |
| SRR64572<br>09 | PRJNA429<br>259 | SAMN083<br>27465 |                         |                                        | seawater                        |                             | marine water             | 28.01    | -88      | 0.1357% |

|                |                 |                    |                              |                                                 |                                 |                                                 |                       |               |           |         |
|----------------|-----------------|--------------------|------------------------------|-------------------------------------------------|---------------------------------|-------------------------------------------------|-----------------------|---------------|-----------|---------|
| SRR64574<br>07 | PRJNA429<br>259 | SAMN083<br>27758   |                              |                                                 | seawater                        |                                                 | marine water          | 26.91         | -89.07    | 0.1272% |
| SRR14606<br>10 | PRJNA253<br>405 | SAMN028<br>70531   | Ocean                        | open water                                      | water                           |                                                 | marine water          | 27.3672       | -90.5779  | 0.1241% |
| SRR61764<br>55 | PRJNA419<br>719 | SAMN077<br>89137   | marine                       | sea water                                       | water                           |                                                 | marine water          | 29.635        | -93.642   | 0.1165% |
| SRR82849<br>67 | PRJNA508<br>441 | SAMN105<br>22620   |                              |                                                 | Coastal water                   |                                                 | coastal water         | 22.59         | 113.98    | 0.1128% |
| SRR64573<br>19 | PRJNA429<br>259 | SAMN083<br>27840   |                              |                                                 | seawater                        |                                                 | marine water          | 27.51         | -89.01    | 0.1115% |
| SRR64573<br>29 | PRJNA429<br>259 | SAMN083<br>27791   |                              |                                                 | seawater                        |                                                 | marine water          | 27.01         | -87.15    | 0.1095% |
| SRR64572<br>12 | PRJNA429<br>259 | SAMN083<br>27900   |                              |                                                 | seawater                        |                                                 | marine water          | 29.01         | -87.49    | 0.1090% |
| SRR75472<br>40 | PRJNA480<br>575 | SAMN096<br>41961   |                              |                                                 | Scrippsella                     |                                                 | host-associated       | 22.49         | 113.99    | 0.1077% |
| ERR15521<br>22 | PRJEB149<br>70  | SAMEA43<br>59410   | urban biome                  | research facility                               | microbial mat                   | microbial mat/biofilm                           | microbial mat/biofilm | 48.97306<br>2 | -119.4769 | 0.1054% |
| SRR31114<br>19 | PRJNA309<br>048 | SAMN044<br>20617   | -                            | -                                               | Seawater                        | marine metagenome                               | Marine water          | 42.56602<br>5 | 34.183592 | 0.1051% |
| SRR31569<br>03 | PRJNA310<br>143 | SAMN044<br>81067   | -                            | -                                               | sediment                        |                                                 | coastal sediment      | 6.542195      | 3.520752  | 0.1021% |
| SRR31568<br>15 | PRJNA310<br>143 | SAMN044<br>81076   | -                            | -                                               | sediment                        |                                                 | coastal sediment      | 6.542195      | 3.520752  | 0.1017% |
| SRR82850<br>09 | PRJNA508<br>441 | SAMN105<br>22647   |                              |                                                 | Coastal water                   |                                                 | coastal water         | 22.51         | 113.96    | 0.0988% |
| SRR31568<br>46 | PRJNA310<br>143 | SAMN044<br>81077   | -                            | -                                               | sediment                        |                                                 | coastal sediment      | 6.542195      | 3.520752  | 0.0979% |
| SRR56609<br>15 | PRJNA388<br>981 | SAMN071<br>91707   | river                        |                                                 | sediment                        |                                                 | freshwater sediment   | 38            | 117       | 0.0974% |
| ERR19428<br>89 | PRJEB205<br>02  | SAMEA10<br>3984233 | estuarine biome              | brackish estuary                                | estuarine water                 | water                                           | marine water          | -12.51        | 130.94    | 0.0970% |
| SRR31568<br>13 | PRJNA310<br>143 | SAMN044<br>81066   | -                            | -                                               | sediment                        |                                                 | coastal sediment      | 6.542195      | 3.520752  | 0.0893% |
| SRR23498<br>45 | PRJNA295<br>127 | SAMN040<br>44561   | brackish lagoon              | Natural zone of ecological interest             | microbial mat                   | microbial mat metagenome                        | microbial mat/biofilm | 43.45257      | 5.230085  | 0.0846% |
| SRR64573<br>17 | PRJNA429<br>259 | SAMN083<br>27851   |                              |                                                 | seawater                        |                                                 | marine water          | 27.5          | -89       | 0.0844% |
| ERR21914<br>84 | PRJEB233<br>34  | SAMEA10<br>4368986 | marine biome (ENVO:00000447) | oceanic bathypelagic zone biome (ENVO:01000037) | saline water (ENVO:00002010)    | miscellaneous natural or artificial environment | marine water          | 40.64194<br>4 | 2.8505556 | 0.0815% |
| SRR61764<br>41 | PRJNA419<br>719 | SAMN077<br>89071   | marine                       | sea water                                       | water                           |                                                 | marine water          | 29.635        | -93.642   | 0.0757% |
| SRR70847<br>77 | PRJNA449<br>342 | SAMN090<br>02942   |                              |                                                 | Petroleum-contaminated sediment |                                                 | coastal sediment      | 29.29         | -89.91    | 0.0752% |

|            |             |              |                            |                            |                  |                     |                     |          |           |         |
|------------|-------------|--------------|----------------------------|----------------------------|------------------|---------------------|---------------------|----------|-----------|---------|
| SRR8285010 | PRJNA508441 | SAMN10522648 |                            |                            | Coastal water    |                     | coastal water       | 22.5     | 113.97    | 0.0716% |
| SRR6457327 | PRJNA429259 | SAMN08327789 |                            |                            | seawater         |                     | marine water        | 27.01    | -87.15    | 0.0677% |
| SRR6457159 | PRJNA429259 | SAMN08327854 |                            |                            | seawater         |                     | marine water        | 27.5     | -89       | 0.0674% |
| SRR8284945 | PRJNA508441 | SAMN10522679 |                            |                            | Coastal water    |                     | coastal water       | 22.53    | 113.95    | 0.0619% |
| SRR6188401 | PRJNA414763 | SAMN07809461 | coastal seawater           | ocean                      | seawater         |                     | marine water        | -5.99    | -35.08    | 0.0589% |
| SRR6176463 | PRJNA419719 | SAMN07789072 | marine                     | sea water                  | water            |                     | marine water        | 29.635   | -93.642   | 0.0572% |
| SRR8284941 | PRJNA508441 | SAMN10522683 |                            |                            | Coastal water    |                     | coastal water       | 22.51    | 113.96    | 0.0551% |
| SRR5861444 | PRJNA395513 | SAMN07409462 | lake                       |                            |                  | aquatic metagenome  | freshwater          | 46.3615  | 25.0509   | 0.0501% |
| SRR8284946 | PRJNA508441 | SAMN10522680 |                            |                            | Coastal water    |                     | coastal water       | 22.5     | 114.01    | 0.0444% |
| SRR8284948 | PRJNA508441 | SAMN10522682 |                            |                            | Coastal water    |                     | coastal water       | 22.5     | 113.98    | 0.0430% |
| SRR8371922 | PRJNA511934 | SAMN10651608 | human gut                  | stool                      | stool            |                     | host-associated     | 17.424   | 78.4275   | 0.0329% |
| ERR713050  | PRJEB8105   | SAMEA3182223 | wastewater treatment plant | wastewater treatment plant | activated sludge | wastewater/sludge   | wastewater/sludge   | 56.65678 | 8.20202   | 0.0311% |
| SRR2954073 | PRJNA300310 | SAMN04218760 | coast                      | marsh                      | sediment         | sediment metagenome | coastal sediment    | 29.2801  | -89.97583 | 0.0266% |
| SRR8371915 | PRJNA511934 | SAMN10651605 | human gut                  | stool                      | stool            |                     | host-associated     | 17.424   | 78.4275   | 0.0262% |
| SRR8371934 | PRJNA511934 | SAMN10651594 | human gut                  | stool                      | stool            |                     | host-associated     | 17.424   | 78.4275   | 0.0162% |
| SRR2953985 | PRJNA300310 | SAMN04218880 | coast                      | marsh                      | sediment         | sediment metagenome | coastal sediment    | 29.30231 | -90.59848 | 0.0155% |
| SRR2954201 | PRJNA300310 | SAMN04218987 | coast                      | marsh                      | sediment         | sediment metagenome | coastal sediment    | 29.30231 | -90.59848 | 0.0144% |
| SRR8241213 | PRJNA506852 | SAMN10475025 | Terrestrial                |                            | soil             | soil metagenome     | soil                | 32.38    | 120.54    | 0.0134% |
| SRR2953925 | PRJNA300310 | SAMN04218820 | coast                      | marsh                      | sediment         | sediment metagenome | coastal sediment    | 29.2801  | -89.97583 | 0.0091% |
| SRR5313229 | PRJNA377204 | SAMN06458645 | lake                       | -                          | sediment         | aquatic metagenome  | freshwater sediment | 37.19    | 96.81     | 0.0091% |
| SRR2953928 | PRJNA300310 | SAMN04218823 | coast                      | marsh                      | sediment         | sediment metagenome | coastal sediment    | 29.2801  | -89.97583 | 0.0089% |
| SRR2954205 | PRJNA300310 | SAMN04218991 | coast                      | marsh                      | sediment         | sediment metagenome | coastal sediment    | 29.30231 | -90.59848 | 0.0078% |

|            |             |                |                            |                            |               |  |                             |                      |          |           |         |
|------------|-------------|----------------|----------------------------|----------------------------|---------------|--|-----------------------------|----------------------|----------|-----------|---------|
| SRR5641659 | PRJNA388861 | SAMN07187868   | Terrestrial                |                            | soil          |  |                             | soil                 | 37.7     | 117.5     | 0.0068% |
| SRR2954206 | PRJNA300310 | SAMN04218992   | coast                      | marsh                      | sediment      |  | sediment metagenome         | coastal sediment     | 29.30231 | -90.59848 | 0.0068% |
| SRR2953984 | PRJNA300310 | SAMN04218879   | coast                      | marsh                      | sediment      |  | sediment metagenome         | coastal sediment     | 29.30231 | -90.59848 | 0.0064% |
| SRR5478605 | PRJNA384096 | SAMN06828353   | ENVO:01000022              | ENVO:01001305              | ENVO:00002243 |  |                             | soil                 | 29.44105 | -89.93337 | 0.0060% |
| SRR5860941 | PRJNA395500 | SAMN07407707   | Wetland                    | Coastal wetland            | Sediment      |  |                             | coastal sediment     | 22.49    | 114.03    | 0.0059% |
| ERR580987  | PRJEB7017   | SAMEA2707859   | hypersaline                | lake                       | sediment      |  | hypersaline lake metagenome | hypersaline sediment | 32.84455 | 119.3978  | 0.0057% |
| ERR1942875 | PRJEB20502  | SAMEA103984219 | estuarine biome            | estuarine mud              | sediment      |  | sediment metagenome         | coastal sediment     | -12.51   | 130.94    | 0.0056% |
| SRR5178036 | PRJNA361424 | SAMN06233428   | marine                     | -                          | sediment      |  | marine metagenome           | marine sediment      | 22.44    | 72.13     | 0.0052% |
| SRR2136643 | PRJNA291553 | SAMN03945400   | wastewater treatment plant | wastewater treatment plant | sludge        |  | bioreactor metagenome       | wastewater/sludge    | 45.76    | 126.69    | 0.0049% |
| SRR5860854 | PRJNA395500 | SAMN07407754   | Wetland                    | Coastal wetland            | Sediment      |  |                             | coastal sediment     | 22.49    | 114.03    | 0.0048% |
| SRR1291083 | PRJNA214261 | SAMN02786282   | estuarine biome            | estuarine sediment         | sediment      |  | sediment metagenome         | coastal sediment     | 40.878   | 121.563   | 0.0047% |
| SRR1566041 | PRJNA260373 | SAMN03020622   | Terrestrial                | land                       | soil          |  | solid waste metagenome      | soil                 | -3.4246  | 36.6796   | 0.0046% |
| DRR061135  | PRJDB4849   | SAMD00051894   | sediment                   | tsunami sediment           | -             |  | sediment metagenome         | marine sediment      | 38.25    | 141.14    | 0.0045% |
| SRR5478607 | PRJNA384096 | SAMN06828351   | ENVO:01000022              | ENVO:01001305              | ENVO:00002243 |  |                             | soil                 | 29.44105 | -89.93337 | 0.0045% |
| SRR5478649 | PRJNA384096 | SAMN06828309   | ENVO:01000022              | ENVO:01001305              | ENVO:00002243 |  |                             | soil                 | 29.44105 | -89.93337 | 0.0044% |
| DRR061171  | PRJDB4850   | SAMD00051938   | sediment                   | tsunami sediment           | -             |  | sediment metagenome         | marine sediment      | 38.25    | 141.14    | 0.0043% |
| SRR5313235 | PRJNA377204 | SAMN06458639   | lake                       | -                          | sediment      |  | aquatic metagenome          | freshwater sediment  | 37.19    | 96.81     | 0.0039% |
| SRR6457514 | PRJNA429259 | SAMN08327770   |                            |                            | seawater      |  |                             | marine water         | 26.99    | -87.98    | 0.0039% |
| DRR061167  | PRJDB4850   | SAMD00051933   | sediment                   | tsunami sediment           | -             |  | sediment metagenome         | marine sediment      | 38.25    | 141.14    | 0.0038% |
| SRR1303665 | PRJNA248705 | SAMN02800760   | lake                       | lake                       | sediment      |  | sediment metagenome         | freshwater sediment  | 37.2     | 96.8      | 0.0037% |
| SRR2004058 | PRJNA236538 | SAMN03481568   | soil                       | soil                       | soil          |  | soil metagenome             | soil                 | 39.99    | 116.33    | 0.0035% |
| SRR5860828 | PRJNA395500 | SAMN07407739   | Wetland                    | Coastal wetland            | Sediment      |  |                             | coastal sediment     | 22.49    | 114.03    | 0.0033% |

|            |             |                |                 |                   |               |                              |                     |           |           |         |
|------------|-------------|----------------|-----------------|-------------------|---------------|------------------------------|---------------------|-----------|-----------|---------|
| SRR5478608 | PRJNA384096 | SAMN06828350   | ENVO:01000022   | ENVO:01001305     | ENVO:00002243 |                              | soil                | 29.44105  | -89.93337 | 0.0033% |
| SRR5178043 | PRJNA361424 | SAMN06233421   | marine          | -                 | sediment      | marine metagenome            | marine sediment     | 21.07     | 72.07     | 0.0032% |
| SRR5478596 | PRJNA384096 | SAMN06828362   | ENVO:01000022   | ENVO:01001305     | ENVO:00002243 |                              | soil                | 29.44105  | -89.93337 | 0.0031% |
| ERR2264808 | PRJEB24590  | SAMEA104542027 | blood plasma    | blood plasma      | blood plasma  | host-associated              | host-associated     | 39.9      | 116.3     | 0.0030% |
| SRR5478578 | PRJNA384096 | SAMN06828380   | ENVO:01000022   | ENVO:01001305     | ENVO:00002243 |                              | soil                | 29.44105  | -89.93337 | 0.0029% |
| SRR1566111 | PRJNA260373 | SAMN03020622   | Terrestrial     | land              | soil          | solid waste metagenome       | soil                | -3.4246   | 36.6796   | 0.0028% |
| ERR1942699 | PRJEB20502  | SAMEA103983947 | estuarine biome | estuarine mud     | sediment      | sediment metagenome          | coastal sediment    | -12.51    | 130.94    | 0.0024% |
| SRR3984649 | PRJNA328605 | SAMN05357684   | mangrove        | -                 | soil          | soil metagenome              | soil                | 23.01577  | -43.36311 | 0.0024% |
| SRR3736123 | PRJNA326707 | SAMN05284540   | estuarine biome |                   | sediment      | aquatic metagenome           | coastal sediment    | 24.431    | 117.85    | 0.0023% |
| SRR5313237 | PRJNA377204 | SAMN06458637   | lake            | -                 | sediment      | aquatic metagenome           | freshwater sediment | 37.19     | 96.81     | 0.0022% |
| DRR061188  | PRJDB4850   | SAMD00051945   | sediment        | tsunami sediment  | -             | sediment metagenome          | marine sediment     | 38.25     | 141.14    | 0.0022% |
| SRR3736100 | PRJNA326707 | SAMN05284529   | estuarine biome |                   | sediment      | aquatic metagenome           | coastal sediment    | 24.465    | 117.8     | 0.0021% |
| DRR061145  | PRJDB4849   | SAMD00051904   | sediment        | tsunami sediment  | -             | sediment metagenome          | marine sediment     | 38.25     | 141.14    | 0.0021% |
| SRR5320730 | PRJNA378479 | SAMN06546956   | Terrestrial     | marsh             | soil          | soil metagenome              | soil                | 37.221464 | -6.962177 | 0.0020% |
| SRR3736140 | PRJNA326707 | SAMN05284551   | estuarine biome |                   | sediment      | aquatic metagenome           | coastal sediment    | 24.423    | 118.025   | 0.0020% |
| SRR3736147 | PRJNA326707 | SAMN05284531   | estuarine biome |                   | sediment      | aquatic metagenome           | coastal sediment    | 24.431    | 117.849   | 0.0019% |
| SRR1923179 | PRJNA236538 | SAMN03417995   | soil            | soil              | soil          | soil metagenome              | soil                | 39.99     | 116.33    | 0.0019% |
| SRR8552943 | PRJNA521586 | SAMN10906667   | sludge2         | bioreactor sludge | wastewater    | bioreactor sludge metagenome | wastewater/sludge   | 41.130036 | 24.88649  | 0.0018% |
| DRR061140  | PRJDB4849   | SAMD00051899   | sediment        | tsunami sediment  | -             | sediment metagenome          | marine sediment     | 38.25     | 141.14    | 0.0018% |
| SRR4527248 | PRJNA351282 | SAMN05952722   | mangrove        |                   | sediment      | soil metagenome              | coastal sediment    | 22.4833   | 113.9833  | 0.0016% |
| DRR061176  | PRJDB4850   | SAMD00051946   | sediment        | tsunami sediment  | -             | sediment metagenome          | marine sediment     | 38.25     | 141.14    | 0.0014% |
| DRR061173  | PRJDB4850   | SAMD00051941   | sediment        | tsunami sediment  | -             | sediment metagenome          | marine sediment     | 38.25     | 141.14    | 0.0014% |



|            |             |              |                      |                                     |               |                                |                       |           |           |         |
|------------|-------------|--------------|----------------------|-------------------------------------|---------------|--------------------------------|-----------------------|-----------|-----------|---------|
| DRR061180  | PRJDB4850   | SAMD00051912 | sediment             | tsunami sediment                    | -             | sediment metagenome            | marine sediment       | 38.25     | 141.14    | 0.0014% |
| DRR061169  | PRJDB4850   | SAMD00051935 | sediment             | tsunami sediment                    | -             | sediment metagenome            | marine sediment       | 38.25     | 141.14    | 0.0013% |
| DRR061168  | PRJDB4850   | SAMD00051934 | sediment             | tsunami sediment                    | -             | sediment metagenome            | marine sediment       | 38.25     | 141.14    | 0.0012% |
| DRR061154  | PRJDB4850   | SAMD00051914 | sediment             | tsunami sediment                    | -             | sediment metagenome            | marine sediment       | 38.25     | 141.14    | 0.0012% |
| SRR8552941 | PRJNA521586 | SAMN10906668 | sludge3              | bioreactor sludge                   | wastewater    | bioreactor sludge metagenome   | wastewater/sludge     | 41.130036 | 24.88649  | 0.0012% |
| SRR1560360 | PRJNA259284 | SAMN03009814 | river sludge         | river banks                         | water         | freshwater sediment metagenome | freshwater sediment   | -         | 36.6795   | 0.0012% |
| SRR1980861 | PRJNA281530 | SAMN03491558 | marine pelagic biome | marine water body                   | water         | seawater metagenome            | marine water          | 13.88     | -116.47   | 0.0012% |
| SRR5313225 | PRJNA377204 | SAMN06458649 | lake                 | -                                   | sediment      | aquatic metagenome             | freshwater sediment   | 37.19     | 96.81     | 0.0012% |
| DRR061179  | PRJDB4850   | SAMD00051950 | sediment             | tsunami sediment                    | -             | sediment metagenome            | marine sediment       | 38.25     | 141.14    | 0.0011% |
| SRR1980864 | PRJNA281530 | SAMN03491561 | marine pelagic biome | marine water body                   | water         | seawater metagenome            | marine water          | 13.88     | -116.47   | 0.0011% |
| SRR6457431 | PRJNA429259 | SAMN08327873 |                      |                                     | seawater      |                                | marine water          | 28.01     | -87.51    | 0.0011% |
| ERR1552102 | PRJEB14970  | SAMEA4359390 | urban biome          | research facility                   | microbial mat | microbial mat/biofilm          | microbial mat/biofilm | 48.973062 | -119.4769 | 0.0010% |
| SRR7547211 | PRJNA480575 | SAMN09641961 |                      |                                     | Scrippsiella  |                                | host-associated       | 22.49     | 113.99    | 0.0010% |
| SRR6457232 | PRJNA429259 | SAMN08327731 |                      |                                     | seawater      |                                | marine water          | 27        | -89.99    | 0.0009% |
| SRR5313202 | PRJNA377204 | SAMN06458672 | lake                 | -                                   | sediment      | aquatic metagenome             | freshwater sediment   | 37.45     | 95.41     | 0.0009% |
| SRR5313220 | PRJNA377204 | SAMN06458654 | lake                 | -                                   | sediment      | aquatic metagenome             | freshwater sediment   | 37.19     | 96.81     | 0.0009% |
| SRR6428887 | PRJNA427280 | SAMN08226088 | sponge tissue        |                                     | tissue        | sponge metagenome              | host-associated       | -         | -42.55074 | 0.0009% |
| ERR1552277 | PRJEB14970  | SAMEA4359565 | urban biome          | research facility                   | microbial mat | microbial mat/biofilm          | microbial mat/biofilm | 48.973062 | -119.4769 | 0.0009% |
| SRR2349956 | PRJNA295127 | SAMN04044565 | brackish lagoon      | Natural zone of ecological interest | microbial mat | microbial mat metagenome       | microbial mat/biofilm | 43.45257  | 5.230085  | 0.0009% |
| ERR1552283 | PRJEB14970  | SAMEA4359571 | urban biome          | research facility                   | microbial mat | microbial mat/biofilm          | microbial mat/biofilm | 48.973062 | -119.4769 | 0.0008% |
| SRR5661020 | PRJNA388981 | SAMN07191707 | river                |                                     | sediment      |                                | freshwater sediment   | 38        | 117       | 0.0006% |
| SRR2961643 | PRJNA304211 | SAMN04296793 | deciduous woodland   | wetland                             | sediment      | sediment metagenome            | coastal sediment      | 37.76694  | 119.16888 | 0.0005% |

|                |                 |                  |                              |                           |       |                          |                     |          |           |         |
|----------------|-----------------|------------------|------------------------------|---------------------------|-------|--------------------------|---------------------|----------|-----------|---------|
| SRR29616<br>42 | PRJNA304<br>209 | SAMN042<br>96782 | deciduous<br>woodland        | wetland                   | soil  | soil metagenome          | soil                | 37.76694 | 119.16888 | 0.0005% |
| SRR14623<br>95 | PRJNA253<br>671 | SAMN028<br>86300 | abalone seed<br>nursing pond | abalone seed nursing pond | water | marine metagenome        | marine water        | 22.47    | 15.21     | 0.0005% |
| SRR69873<br>73 | PRJNA427<br>223 | SAMN082<br>25636 | lake                         |                           | water | freshwater<br>metagenome | freshwater          | 39.0367  | -84.1381  | 0.0005% |
| SRR25792<br>84 | PRJNA298<br>100 | SAMN041<br>55558 | Terrestrial                  | soil                      | soil  | soil metagenome          | soil                | 39.95    | 116.28    | 0.0003% |
| SRR52622<br>88 | PRJNA374<br>976 | SAMN063<br>41004 | Terrestrial                  | -                         | soil  | soil metagenome          | soil                | 18.73    | 110.2     | 0.0003% |
| SRR63045<br>18 | PRJNA358<br>048 | SAMN061<br>12733 | lake                         | -                         | water | aquatic metagenome       | freshwater          | 31.53    | 120.21    | 0.0001% |
| SRR56660<br>78 | PRJNA390<br>005 | SAMN072<br>12121 | seashore                     | pond                      | water | gut metagenome           | host-<br>associated | 21.68    | 110.88    | 0.0001% |

**Table S6. Functional annotation of FT118-specific orthogroups.**

| Orthogroup | EGGNOG Annotation                                                                                                                      | #genes |
|------------|----------------------------------------------------------------------------------------------------------------------------------------|--------|
| OG0000044  | COG0643 Chemotaxis protein histidine kinase and related kinases                                                                        | 1      |
|            | His Kinase A (phosphoacceptor) domain                                                                                                  | 5      |
|            | Histidine kinase                                                                                                                       | 1      |
|            | PAS domain                                                                                                                             | 1      |
|            | PAS fold                                                                                                                               | 1      |
|            | PhoQ Sensor                                                                                                                            | 7      |
|            | Response regulator receiver                                                                                                            | 1      |
| OG0000672  | ATP-binding region ATPase domain protein                                                                                               | 1      |
|            | Helix-turn-helix domain                                                                                                                | 1      |
|            | Helix-turn-helix XRE-family like proteins                                                                                              | 1      |
|            | His Kinase A (phosphoacceptor) domain                                                                                                  | 4      |
|            | Histidine kinase                                                                                                                       | 1      |
|            | transcriptional regulator                                                                                                              | 1      |
| OG0001123  | Belongs to the sigma-70 factor family. ECF subfamily                                                                                   | 2      |
|            | Histidine kinase                                                                                                                       | 1      |
|            | In <i>Caulobacter crescentus</i> , CC3477 is differentially expressed in minimal salts media with glucose as compared to complex media | 1      |
|            | Sigma-70 region 2                                                                                                                      | 1      |
|            | Sigma-70, region 4                                                                                                                     | 3      |
| OG0001410  | Hydantoinase/oxoprolinase                                                                                                              | 2      |
|            | Hydantoinase/oxoprolinase N-terminal region                                                                                            | 2      |
|            | N-methylhydantoinase A acetone carboxylase, beta subunit                                                                               | 3      |
| OG0001421  | diguanylate cyclase                                                                                                                    | 2      |
|            | PFAM EAL domain                                                                                                                        | 1      |
|            | Putative diguanylate phosphodiesterase                                                                                                 | 4      |
| OG0001428  | Belongs to the binding-protein-dependent transport system permease family                                                              | 7      |
| OG0001430  | Bacterial regulatory proteins, tetR family                                                                                             | 4      |

---

|           |                                                                                                         |   |
|-----------|---------------------------------------------------------------------------------------------------------|---|
|           | transcriptional regulator                                                                               | 3 |
| OG0001626 | PFAM TadE family protein                                                                                | 2 |
|           | Putative Flp pilus-assembly TadE/G-like                                                                 | 4 |
| OG0001627 | Pyruvate 2-oxoglutarate dehydrogenase complex dehydrogenase (E1) component eukaryotic type beta subunit | 2 |
|           | Transketolase, pyrimidine binding domain                                                                | 4 |
| OG0001774 | COG1522 Transcriptional regulators                                                                      | 1 |
|           | helix_turn_helix ASNC type                                                                              | 3 |
|           | transcriptional                                                                                         | 1 |
| OG0001785 | Bacterial periplasmic substrate-binding proteins                                                        | 1 |
|           | Binding-protein-dependent transport system inner membrane component                                     | 4 |
| OG0001869 | Filamentation induced by cAMP protein fic                                                               | 1 |
| OG0001878 | ATPase activator activity                                                                               | 1 |
|           | DnaJ molecular chaperone homology domain                                                                | 3 |
| OG0001888 | Adenylate and Guanylate cyclase catalytic domain                                                        | 1 |
|           | Adenylate cyclase                                                                                       | 2 |
|           | Transcriptional regulatory protein, C terminal                                                          | 1 |
| OG0001889 | COG0665 Glycine D-amino acid oxidases (deaminating)                                                     | 1 |
|           | FAD dependent oxidoreductase                                                                            | 2 |
|           | Sarcosine oxidase beta subunit                                                                          | 1 |
| OG0001890 | COG0589 Universal stress protein UspA and related nucleotide-binding proteins                           | 1 |
|           | Universal stress protein                                                                                | 1 |
|           | Universal stress protein family                                                                         | 2 |
| OG0001899 | ABC-type nitrate sulfonate bicarbonate transport systems, periplasmic components                        | 1 |
|           | COG0715 ABC-type nitrate sulfonate bicarbonate transport systems periplasmic components                 | 1 |
|           | NMT1-like family                                                                                        | 2 |
| OG0001910 | unannotated                                                                                             | 4 |
| OG0001911 | unannotated                                                                                             | 4 |
| OG0001982 | Flp Fap pilin component                                                                                 | 2 |
| OG0001987 | DUF35 OB-fold domain, acyl-CoA-associated                                                               | 2 |

---

---

|           |                                                                                                                                                                                                                                                                                                                                                                                                                                                                       |   |
|-----------|-----------------------------------------------------------------------------------------------------------------------------------------------------------------------------------------------------------------------------------------------------------------------------------------------------------------------------------------------------------------------------------------------------------------------------------------------------------------------|---|
|           | Rubredoxin-like zinc ribbon domain (DUF35_N)                                                                                                                                                                                                                                                                                                                                                                                                                          | 1 |
| OG0001991 | Glycosyl transferase family group 2                                                                                                                                                                                                                                                                                                                                                                                                                                   | 1 |
|           | transferase activity, transferring glycosyl groups                                                                                                                                                                                                                                                                                                                                                                                                                    | 1 |
|           | Type II secretion system (T2SS), protein E, N-terminal domain                                                                                                                                                                                                                                                                                                                                                                                                         | 1 |
| OG0001993 | Chorismate mutase type II                                                                                                                                                                                                                                                                                                                                                                                                                                             | 1 |
| OG0001997 | Chain length determinant family protein                                                                                                                                                                                                                                                                                                                                                                                                                               | 1 |
|           | Chain length determinant protein                                                                                                                                                                                                                                                                                                                                                                                                                                      | 1 |
|           | Involved in chromosome partitioning                                                                                                                                                                                                                                                                                                                                                                                                                                   | 1 |
| OG0002007 | Nitrile hydratase beta subunit                                                                                                                                                                                                                                                                                                                                                                                                                                        | 2 |
| OG0002009 | unannotated                                                                                                                                                                                                                                                                                                                                                                                                                                                           | 3 |
| OG0002015 | 2Fe-2S iron-sulfur cluster binding domain                                                                                                                                                                                                                                                                                                                                                                                                                             | 1 |
|           | Belongs to the GcvT family                                                                                                                                                                                                                                                                                                                                                                                                                                            | 2 |
| OG0002025 | PAS domain                                                                                                                                                                                                                                                                                                                                                                                                                                                            | 3 |
| OG0002035 | Major facilitator Superfamily                                                                                                                                                                                                                                                                                                                                                                                                                                         | 3 |
| OG0002136 | Phosphoadenosine phosphosulfate reductase family                                                                                                                                                                                                                                                                                                                                                                                                                      | 1 |
|           | Reduction of activated sulfate into sulfite                                                                                                                                                                                                                                                                                                                                                                                                                           | 1 |
| OG0002137 | Asp Glu Hydantoin racemase family protein                                                                                                                                                                                                                                                                                                                                                                                                                             | 1 |
|           | Maleate cis-trans isomerase                                                                                                                                                                                                                                                                                                                                                                                                                                           | 1 |
| OG0002140 | AsmA family                                                                                                                                                                                                                                                                                                                                                                                                                                                           | 1 |
|           | protein involved in outer membrane biogenesis                                                                                                                                                                                                                                                                                                                                                                                                                         | 1 |
| OG0002143 | FliM is one of three proteins (FliG, FliN, FliM) that forms the rotor-mounted switch complex (C ring), located at the base of the basal body. This complex interacts with the CheY and CheZ chemotaxis proteins, in addition to contacting components of the motor that determine the direction of flagellar rotation                                                                                                                                                 | 2 |
| OG0002145 | ATP synthase B/B' CF(0)                                                                                                                                                                                                                                                                                                                                                                                                                                               | 1 |
|           | Component of the F(0) channel, it forms part of the peripheral stalk, linking F(1) to F(0)                                                                                                                                                                                                                                                                                                                                                                            | 1 |
| OG0002146 | ATP synthase subunit C                                                                                                                                                                                                                                                                                                                                                                                                                                                | 1 |
|           | F(1)F(0) ATP synthase produces ATP from ADP in the presence of a proton or sodium gradient. F-type ATPases consist of two structural domains, F(1) containing the extramembraneous catalytic core and F(0) containing the membrane proton channel, linked together by a central stalk and a peripheral stalk. During catalysis, ATP synthesis in the catalytic domain of F(1) is coupled via a rotary mechanism of the central stalk subunits to proton translocation | 1 |
| OG0002147 | it plays a direct role in the translocation of protons across the membrane                                                                                                                                                                                                                                                                                                                                                                                            | 2 |

---

|           |                                                                                |   |
|-----------|--------------------------------------------------------------------------------|---|
| OG0002148 | Putative F0F1-ATPase subunit Ca <sup>2+</sup> /Mg <sup>2+</sup> transporter    | 2 |
| OG0002149 | Produces ATP from ADP in the presence of a proton gradient across the membrane | 2 |
| OG0002150 | Protein of unknown function (DUF2892)                                          | 1 |
|           | Rhodanese Homology Domain                                                      | 1 |
| OG0002152 | PEP-CTERM motif                                                                | 1 |
| OG0002155 | Glyoxalase-like domain                                                         | 2 |
| OG0002160 | Putative beta-barrel porin 2                                                   | 2 |
| OG0002162 | Glycosyl transferases group 1                                                  | 1 |
|           | glycosyltransferase                                                            | 1 |
| OG0002163 | Sulfotransferase domain                                                        | 1 |
|           | Sulfotransferase family                                                        | 1 |
| OG0002172 | unannotated                                                                    | 2 |
| OG0002174 | unannotated                                                                    | 2 |
| OG0002175 | COG2771 DNA-binding HTH domain-containing proteins                             | 1 |
|           | helix_turn_helix, Lux Regulon                                                  | 1 |
| OG0002176 | Glycosyl transferase, family 2                                                 | 1 |
|           | protein transport                                                              | 1 |
| OG0002178 | unannotated                                                                    | 2 |
| OG0002181 | Endoribonuclease L-PSP                                                         | 2 |
| OG0002182 | Divergent polysaccharide deacetylase                                           | 1 |
|           | protein conserved in bacteria                                                  | 1 |
| OG0002185 | Protein of unknown function (DUF3485)                                          | 1 |
|           | Transmembrane exosortase (Exosortase_EpsH)                                     | 1 |
| OG0002187 | Sarcosine oxidase subunit delta                                                | 1 |
|           | Sarcosine oxidase, delta subunit                                               | 1 |
| OG0002192 | protein conserved in bacteria                                                  | 2 |
| OG0002193 | unannotated                                                                    | 2 |
| OG0002196 | MotA/TolQ/ExbB proton channel family                                           | 1 |

---

|           |                                                                                                                                                                                 |   |
|-----------|---------------------------------------------------------------------------------------------------------------------------------------------------------------------------------|---|
|           | With MotB forms the ion channels that couple flagellar rotation to proton sodium motive force across the membrane and forms the stator elements of the rotary flagellar machine | 1 |
| OG0002197 | chemotaxis MotB protein                                                                                                                                                         | 1 |
|           | PFAM OmpA MotB domain protein                                                                                                                                                   | 1 |
| OG0002200 | peptidylprolyl isomerase                                                                                                                                                        | 2 |
| OG0002204 | Belongs to the WrbA family                                                                                                                                                      | 1 |
|           | NADPH-dependent FMN reductase                                                                                                                                                   | 1 |
| OG0002205 | unannotated                                                                                                                                                                     | 2 |
| OG0002206 | protein possibly involved in aromatic compounds catabolism                                                                                                                      | 1 |
|           | protein, possibly involved in aromatic compounds catabolism                                                                                                                     | 1 |
| OG0002207 | unannotated                                                                                                                                                                     | 2 |
| OG0002210 | AraC-like ligand binding domain                                                                                                                                                 | 1 |
|           | Cupin                                                                                                                                                                           | 1 |
| OG0002218 | von Willebrand factor (vWF) type A domain                                                                                                                                       | 2 |
| OG0002228 | Glycosyltransferase family 28 C-terminal domain                                                                                                                                 | 2 |
| OG0002232 | COG3000 Sterol desaturase                                                                                                                                                       | 1 |
|           | Fatty acid hydroxylase superfamily                                                                                                                                              | 1 |
| OG0002234 | unannotated                                                                                                                                                                     | 2 |
| OG0002241 | Acetyl-CoA hydrolase/transferase C-terminal domain                                                                                                                              | 1 |
|           | PFAM Acetyl-CoA hydrolase transferase                                                                                                                                           | 1 |
| OG0002247 | Type II secretion system (T2SS), protein F                                                                                                                                      | 2 |
| OG0002248 | COG1226 Kef-type K transport systems                                                                                                                                            | 1 |
|           | Ion channel                                                                                                                                                                     | 1 |
| OG0002249 | Dodecin                                                                                                                                                                         | 2 |
| OG0002256 | Predicted permease                                                                                                                                                              | 2 |
| OG0002259 | PFAM thioesterase superfamily                                                                                                                                                   | 1 |
|           | Thioesterase superfamily                                                                                                                                                        | 1 |
| OG0002266 | COG1840 ABC-type Fe3 transport system, periplasmic component                                                                                                                    | 1 |
|           | Required for the activity of the bacterial periplasmic transport system of putrescine                                                                                           | 1 |

---

|           |                                                                                       |   |
|-----------|---------------------------------------------------------------------------------------|---|
| OG0002270 | FAD dependent oxidoreductase                                                          | 2 |
| OG0002280 | Belongs to the pirin family                                                           | 2 |
| OG0002284 | unannotated                                                                           | 2 |
| OG0002287 | CrcB-like protein, Camphor Resistance (CrcB)                                          | 1 |
|           | Important for reducing fluoride concentration in the cell, thus reducing its toxicity | 1 |

**Table S7. Measured environmental variables of mangrove sediment samples.**

| Site | Depth (cm) | Temperature (°C) | pH   | Salinity (‰) | NH <sub>4</sub> <sup>+</sup> (mg/g) | NO <sub>3</sub> <sup>-</sup> (ug/g) | NO <sub>2</sub> <sup>-</sup> (ug/g) | Moisture | Dry/wet | TN (mg/g) | TON    | IN/TN  | TC (mg/g)   | TOC (mg/g) | TP (mg/g) | TOC/T ON |
|------|------------|------------------|------|--------------|-------------------------------------|-------------------------------------|-------------------------------------|----------|---------|-----------|--------|--------|-------------|------------|-----------|----------|
| MF1  | 0-2        | 38               | 7.47 | 4            | 0.0120                              | 0.2573                              | 0.0774                              | 0.5782   | 0.4218  | 0.5913    | 0.5790 | 0.0209 | 7.4328      | 6.8723     | 0.5098    | 13.8478  |
| MF1  | 6-8        | 36               | 7.42 | 4            | 0.0198                              | 0.2470                              | 0.0557                              | 0.6243   | 0.3757  | 0.6352    | 0.6152 | 0.0316 | 6.4181      | 6.3614     | 0.3834    | 12.0646  |
| MF1  | 12-14      | 33               | 7.85 | 4            | 0.0258                              | 0.0776                              | 0.0891                              | 0.5016   | 0.4984  | 0.7365    | 0.7105 | 0.0352 | 11.426<br>4 | 10.4241    | 0.5236    | 17.1161  |
| MF1  | 20-22      | 30               | 8.15 | 5            | 0.0234                              | 0.7257                              | 0.0586                              | 0.4474   | 0.5526  | 0.6313    | 0.6072 | 0.0382 | 8.1854      | 7.8613     | 0.4466    | 15.1045  |
| MF1  | 28-30      | 28               | 8.25 | 6            | 0.0086                              | 0.7716                              | 0.0701                              | 0.2724   | 0.7276  | 0.8235    | 0.8140 | 0.0115 | 10.869<br>7 | 9.9818     | 0.7311    | 14.3067  |
| MG1  | 0-2        | 30               | 7.49 | 4            | 0.0200                              | 0.3155                              | 0.0615                              | 0.4796   | 0.5204  | 0.7893    | 0.7689 | 0.0259 | 9.0442      | 8.5605     | 0.6060    | 12.9899  |
| MG1  | 6-8        | 29.5             | 7.68 | 4            | 0.0318                              | 1.0319                              | 0.1007                              | 0.5501   | 0.4499  | 0.6711    | 0.6382 | 0.0491 | 8.9258      | 8.8946     | 0.5254    | 16.2609  |
| MG1  | 12-14      | 29               | 8.01 | 5            | 0.0337                              | 0.6683                              | 0.0838                              | 0.5111   | 0.4889  | 0.6137    | 0.5793 | 0.0561 | 8.0053      | 7.8389     | 0.5276    | 15.7874  |
| MG1  | 20-22      | 28.5             | 8.09 | 6            | 0.0248                              | 1.4665                              | 0.0506                              | 0.4846   | 0.5154  | 0.5917    | 0.5653 | 0.0445 | 7.7151      | 7.4796     | 0.4073    | 15.4350  |
| MG1  | 28-30      | 28               | 8.09 | 10           | 0.0245                              | 1.3025                              | 0.1169                              | 0.4845   | 0.5155  | 0.3969    | 0.3710 | 0.0652 | 6.1692      | 5.6992     | 0.4510    | 17.9207  |



## References

- (1) Peterson BG, Carl P (2020). *\_PerformanceAnalytics: Econometric Tools for Performance and Risk Analysis\_*. R package version 2.0.4, <<https://CRAN.R-project.org/package=PerformanceAnalytics>>.
- (2) LEIFSON E. The Bacterial Flora of Distilled And Stored Water. II. *Caulobacter vibrioides* Henrici and Johnson 1935 in distilled water. *Int J Syst Evol Microbiol.* 1962;12(4):155-60.
- (3) Sun LN, Yang ED, Wei JC, Tang XY, Cao YY, Han GM. *Caulobacter flavus* sp. nov., a stalked bacterium isolated from rhizosphere soil. *Int J Syst Evol Microbiol.* 2015;65(12):4374-80.
- (4) Cho JC, Giovannoni SJ. *Parvularcula bermudensis* gen. nov., sp. nov., a marine bacterium that forms a deep branch in the alpha-Proteobacteria. *Int J Syst Evol Microbiol.* 2003;53(Pt 4):1031-6.
- (5) Harbison AB, Price LE, Flythe MD, Bräuer SL. *Micropepsis pineolensis* gen. nov., sp. nov., a mildly acidophilic alphaproteobacterium isolated from a poor fen, and proposal of *Micropepsaceae* fam. nov. within *Micropepsales* ord. nov. *Int J Syst Evol Microbiol.* 2017;67(4):839-44.
- (6) Tully BJ, Graham ED, Heidelberg JF. The reconstruction of 2,631 draft metagenome-assembled genomes from the global oceans. *Scientific Data.* 2018;5:170203.
- (7) Parks DH, Rinke C, Chuvochina M, Chaumeil P-A, Woodcroft BJ, Evans PN, et al. Recovery of nearly 8,000 metagenome-assembled genomes substantially expands the tree of life. *Nature Microbiology.* 2017;2(11):1533-42.
